# Supplementary material for: Circulating MicroRNAs and Extracellular Vesicle-Derived MicroRNAs as Predictors of Functional Recovery in Ischemic Stroke Patients: A Systematic Review and Meta-Analysis
Source: MDPI journal article supplement (doi:10.3390/ijms24010251), 2022-12-23
Supplement: s1 [file s1]

## Circulating miRNA-based biomarkers of ischemic stroke recovery

Table S4

|                                        |                       |                      |                          |
|----------------------------------------|-----------------------|----------------------|--------------------------|
| Let-7i                                 | Xiang et al. 2017 (1) | Wang et al. 2020 (2) | Jickling et al. 2016 (3) |
| Prospective                            | Yes                   | Yes                  | Yes                      |
| Biomarker evaluator blinded to outcome | No                    | No                   | No                       |
| Defined time period                    | Yes                   | No                   | Yes                      |
| Pre-defined clinical endpoints         | Yes                   | Yes                  | Yes                      |
| Sample size calculation                | No                    | No                   | No                       |
| Candidate variables                    | No                    | No                   | Yes                      |
| Measurement method described           | Yes                   | Yes                  | Yes                      |
| Inclusion/exclusion criteria           | Yes                   | Yes                  | Yes                      |
| <b>Score (of 8)</b>                    | 5                     | 4                    | 6                        |

|                                        |                      |                      |                     |                      |                    |
|----------------------------------------|----------------------|----------------------|---------------------|----------------------|--------------------|
| miR-124                                | Wang et al. 2019 (4) | Yuan et al. 2022 (5) | Xie et al. 2019 (6) | Zhou and Qi 2021 (7) | Ji et al. 2016 (8) |
| Prospective                            | Yes                  | Yes                  | NA (abstract only)  | Yes                  | Yes                |
| Biomarker evaluator blinded to outcome | No                   | No                   |                     | No                   | No                 |
| Defined time period                    | No                   | Yes                  |                     | Yes                  | Yes                |
| Pre-defined clinical endpoints         | Yes                  | Yes                  |                     | Yes                  | Yes                |
| Sample size calculation                | No                   | No                   |                     | No                   | No                 |
| Candidate variables                    | No                   | No                   |                     | Yes                  | No                 |
| Measurement method described           | Yes                  | Yes                  |                     | Yes                  | Yes                |
| Inclusion/exclusion criteria           | Yes                  | Yes                  |                     | Yes                  | No                 |
| <b>Score (of 8)</b>                    | 4                    | 5                    |                     | 6                    | 4                  |

|                                        |                    |                     |
|----------------------------------------|--------------------|---------------------|
| miR-124-3p                             | He et al. 2019 (9) | Qi et al. 2021 (10) |
| Prospective                            | Yes                | No                  |
| Biomarker evaluator blinded to outcome | No                 | No                  |
| Defined time period                    | Yes                | Yes                 |
| Pre-defined clinical endpoints         | Yes                | Yes                 |
| Sample size calculation                | No                 | No                  |
| Candidate variables                    | No                 | No                  |
| Measurement method described           | Yes                | Yes                 |
| Inclusion/exclusion criteria           | Yes                | No                  |
| <b>Score (of 8)</b>                    | 5                  | 3                   |

|         |                        |                        |
|---------|------------------------|------------------------|
| miR-126 | Jin and Xing 2017 (11) | Jin and Xing 2018 (12) |
|---------|------------------------|------------------------|

# Circulating miRNA-based biomarkers of ischemic stroke recovery

|                                        |     |     |
|----------------------------------------|-----|-----|
| Prospective                            | Yes | Yes |
| Biomarker evaluator blinded to outcome | No  | No  |
| Defined time period                    | Yes | Yes |
| Pre-defined clinical endpoints         | Yes | Yes |
| Sample size calculation                | No  | No  |
| Candidate variables                    | Yes | Yes |
| Measurement method described           | Yes | Yes |
| Inclusion/exclusion criteria           | Yes | Yes |
| <b>Score (of 8)</b>                    | 6   | 6   |

|                                        |                       |                       |                       |
|----------------------------------------|-----------------------|-----------------------|-----------------------|
| miR-195                                | Chen et al. 2020 (13) | Yang et al. 2018 (14) | Zhai et al. 2020 (15) |
| Prospective                            | Yes                   | Yes                   | Yes                   |
| Biomarker evaluator blinded to outcome | No                    | No                    | No                    |
| Defined time period                    | Yes                   | Yes                   | Yes                   |
| Pre-defined clinical endpoints         | Yes                   | Yes                   | Yes                   |
| Sample size calculation                | No                    | No                    | No                    |
| Candidate variables                    | No                    | No                    | Yes                   |
| Measurement method described           | Yes                   | Yes                   | Yes                   |
| Inclusion/exclusion criteria           | Yes                   | No                    | Yes                   |
| <b>Score (of 8)</b>                    | 5                     | 4                     | 6                     |

|                                        |                      |                          |                      |
|----------------------------------------|----------------------|--------------------------|----------------------|
| miR-21                                 | Liu et al. 2021 (16) | Zhou and Zhang 2014 (17) | Yuan et al. 2022 (5) |
| Prospective                            | Yes                  | Yes                      | Yes                  |
| Biomarker evaluator blinded to outcome | No                   | No                       | No                   |
| Defined time period                    | Yes                  | Yes                      | Yes                  |
| Pre-defined clinical endpoints         | Yes                  | Yes                      | Yes                  |
| Sample size calculation                | No                   | No                       | No                   |
| Candidate variables                    | No                   | No                       | No                   |
| Measurement method described           | Yes                  | Yes                      | Yes                  |
| Inclusion/exclusion criteria           | Yes                  | Yes                      | Yes                  |
| <b>Score (of 8)</b>                    | 5                    | 5                        | 5                    |

|                                        |                       |                      |                     |                     |
|----------------------------------------|-----------------------|----------------------|---------------------|---------------------|
| miR-29b                                | Wang et al. 2015 (18) | Guo et al. 2020 (19) | Ma et al. 2022 (20) | Li et al. 2022 (21) |
| Prospective                            | Yes                   | NA (Abstract only)   | No                  | Yes                 |
| Biomarker evaluator blinded to outcome | No                    |                      | Yes                 | No                  |
| Defined time period                    | Yes                   |                      | Yes                 | No                  |
| Pre-defined clinical endpoints         | Yes                   |                      | Yes                 | Yes                 |
| Sample size calculation                | No                    |                      | No                  | No                  |
| Candidate variables                    | Yes                   |                      | No                  | No                  |

# Circulating miRNA-based biomarkers of ischemic stroke recovery

|                              |     |  |     |      |
|------------------------------|-----|--|-----|------|
| Measurement method described | Yes |  | Yes | Yes  |
| Inclusion/exclusion criteria | Yes |  | No  | No   |
| <b>Score (of 8)</b>          | 6   |  | 4   | 37.5 |

|                                        |                       |                             |                   |                    |
|----------------------------------------|-----------------------|-----------------------------|-------------------|--------------------|
| miR-9                                  | Chen et al. 2020 (13) | Abdelaleem et al. 2012 (22) | Xue al. 2018 (23) | Ji et al. 2016 (8) |
| Prospective                            | Yes                   | Yes                         | Yes               | Yes                |
| Biomarker evaluator blinded to outcome | No                    | No                          | Yes               | No                 |
| Defined time period                    | Yes                   | No                          | No                | Yes                |
| Pre-defined clinical endpoints         | Yes                   | Yes                         | Yes               | Yes                |
| Sample size calculation                | No                    | No                          | No                | No                 |
| Candidate variables                    | No                    | Yes                         | No                | No                 |
| Measurement method described           | Yes                   | Yes                         | Yes               | Yes                |
| Inclusion/exclusion criteria           | Yes                   | Yes                         | No                | No                 |
| <b>Score (of 8)</b>                    | 5                     | 5                           | 4                 | 4                  |

|                                        |                          |                     |
|----------------------------------------|--------------------------|---------------------|
| miR-125b-5p                            | Kautzky et al. 2022 (24) | He et al. 2019 (25) |
| Prospective                            | Yes                      | Yes                 |
| Biomarker evaluator blinded to outcome | No                       | No                  |
| Defined time period                    | Yes                      | Yes                 |
| Pre-defined clinical endpoints         | Yes                      | Yes                 |
| Sample size calculation                | No                       | No                  |
| Candidate variables                    | Yes                      | No                  |
| Measurement method described           | Yes                      | Yes                 |
| Inclusion/exclusion criteria           | Yes                      | Yes                 |
| <b>Score (of 8)</b>                    | 6                        | 62.5                |

|                                        |                       |                       |
|----------------------------------------|-----------------------|-----------------------|
| miR-335                                | Yuan et al. 2016 (26) | Zhao et al. 2016 (27) |
| Prospective                            | Yes                   | Yes                   |
| Biomarker evaluator blinded to outcome | No                    | No                    |
| Defined time period                    | Yes                   | Yes                   |
| Pre-defined clinical endpoints         | Yes                   | Yes                   |
| Sample size calculation                | No                    | No                    |
| Candidate variables                    | No                    | Yes                   |
| Measurement method described           | Yes                   | Yes                   |
| Inclusion/exclusion criteria           | Yes                   | Yes                   |
| <b>Score (of 8)</b>                    | 5                     | 6                     |

# Circulating miRNA-based biomarkers of ischemic stroke recovery

|                                        |                      |
|----------------------------------------|----------------------|
| miR-185                                | Guo et al. 2022 (28) |
| Prospective                            | Yes                  |
| Biomarker evaluator blinded to outcome | No                   |
| Defined time period                    | Yes                  |
| Pre-defined clinical endpoints         | Yes                  |
| Sample size calculation                | No                   |
| Candidate variables                    | Yes                  |
| Measurement method described           | Yes                  |
| Inclusion/exclusion criteria           | Yes                  |
| <b>Score (of 8)</b>                    | 75                   |

|                                        |                                  |                     |
|----------------------------------------|----------------------------------|---------------------|
| miR-125a-5p                            | Kijpaisalratana et al. 2020 (29) | Ma et al. 2022 (30) |
| Prospective                            | Yes                              | Yes                 |
| Biomarker evaluator blinded to outcome | No                               | No                  |
| Defined time period                    | Yes                              | Yes                 |
| Pre-defined clinical endpoints         | Yes                              | Yes                 |
| Sample size calculation                | No                               | Yes                 |
| Candidate variables                    | Yes                              | Yes                 |
| Measurement method described           | Yes                              | Yes                 |
| Inclusion/exclusion criteria           | Yes                              | Ye                  |
| <b>Score (of 8)</b>                    | 75                               | 87.5                |

|                                        |                       |
|----------------------------------------|-----------------------|
| Let-7e                                 | Peng et al. 2015 (31) |
| Prospective                            | Yes                   |
| Biomarker evaluator blinded to outcome | No                    |
| Defined time period                    | Yes                   |
| Pre-defined clinical endpoints         | Yes                   |
| Sample size calculation                | No                    |
| Candidate variables                    | Yes                   |
| Measurement method described           | Yes                   |

# Circulating miRNA-based biomarkers of ischemic stroke recovery

|                              |     |
|------------------------------|-----|
| Inclusion/exclusion criteria | Yes |
| <b>Score (of 8)</b>          | 75  |

|                                        |                     |                       |                               |                       |
|----------------------------------------|---------------------|-----------------------|-------------------------------|-----------------------|
| Multiple exosomal-derived miRNAs       | Wu et al. 2017 (32) | Zeng et al. 2013 (33) | Otero-Ortega et al. 2021 (34) | Yang et al. 2016 (35) |
| Prospective                            | Yes                 | Yes                   | Yes                           | Yes                   |
| Biomarker evaluator blinded to outcome | No                  | No                    | No                            | No                    |
| Defined time period                    | Yes                 | Yes                   | Yes                           | Yes                   |
| Pre-defined clinical endpoints         | Yes                 | Yes                   | Yes                           | Yes                   |
| Sample size calculation                | No                  | No                    | No                            | No                    |
| Candidate variables                    | No                  | Yes                   | No                            | No                    |
| Measurement method described           | Yes                 | Yes                   | Yes                           | Yes                   |
| Inclusion/exclusion criteria           | Yes                 | Yes                   | Yes                           | Yes                   |
| <b>Score (of 8)</b>                    | 62.5                | 75                    | 62.5                          | 62.5                  |

|                                        |                      |
|----------------------------------------|----------------------|
| Mir-143                                | Zhu et al. 2019 (36) |
| Prospective                            | Yes                  |
| Biomarker evaluator blinded to outcome | No                   |
| Defined time period                    | Yes                  |
| Pre-defined clinical endpoints         | Yes                  |
| Sample size calculation                | No                   |
| Candidate variables                    | Yes                  |
| Measurement method described           | Yes                  |
| Inclusion/exclusion criteria           | Yes                  |
| <b>Score (of 8)</b>                    | 75                   |

|                                        |                      |
|----------------------------------------|----------------------|
| Circulating Exosomal miRNA             | Niu et al. 2021 (37) |
| Prospective                            | Yes                  |
| Biomarker evaluator blinded to outcome | No                   |
| Defined time period                    | Yes                  |
| Pre-defined clinical endpoints         | Yes                  |
| Sample size calculation                | No                   |
| Candidate variables                    | No                   |

# Circulating miRNA-based biomarkers of ischemic stroke recovery

|                              |      |
|------------------------------|------|
| Measurement method described | Yes  |
| Inclusion/exclusion criteria | Yes  |
| <b>Score (of 8)</b>          | 62.5 |

|                                        |                        |
|----------------------------------------|------------------------|
| Mir-132                                | Huang et al. 2016 (38) |
| Prospective                            | Yes                    |
| Biomarker evaluator blinded to outcome | No                     |
| Defined time period                    | Yes                    |
| Pre-defined clinical endpoints         | Yes                    |
| Sample size calculation                | No                     |
| Candidate variables                    | No                     |
| Measurement method described           | Yes                    |
| Inclusion/exclusion criteria           | Yes                    |
| <b>Score (of 8)</b>                    | 62.5                   |

|                                        |                      |
|----------------------------------------|----------------------|
| Mir-411-5p                             | Lin et al. 2022 (39) |
| Prospective                            | Yes                  |
| Biomarker evaluator blinded to outcome | No                   |
| Defined time period                    | Yes                  |
| Pre-defined clinical endpoints         | Yes                  |
| Sample size calculation                | No                   |
| Candidate variables                    | No                   |
| Measurement method described           | Yes                  |
| Inclusion/exclusion criteria           | Yes                  |
| <b>Score (of 8)</b>                    | 62.5                 |

|                                        |                       |
|----------------------------------------|-----------------------|
| Mir-26b                                | Yuan et al. 2016 (40) |
| Prospective                            | Yes                   |
| Biomarker evaluator blinded to outcome | No                    |
| Defined time period                    | No                    |
| Pre-defined clinical endpoints         | Yes                   |
| Sample size calculation                | No                    |
| Candidate variables                    | No                    |

# Circulating miRNA-based biomarkers of ischemic stroke recovery

|                              |     |
|------------------------------|-----|
| Measurement method described | Yes |
| Inclusion/exclusion criteria | Yes |
| <b>Score (of 8)</b>          | 50  |

|                                        |                        |                       |
|----------------------------------------|------------------------|-----------------------|
| Mir-497                                | Zhong et al. 2021 (41) | Zhai et al. 2020 (15) |
| Prospective                            | Yes                    | Yes                   |
| Biomarker evaluator blinded to outcome | No                     | No                    |
| Defined time period                    | No                     | Yes                   |
| Pre-defined clinical endpoints         | Yes                    | Yes                   |
| Sample size calculation                | No                     | No                    |
| Candidate variables                    | No                     | Yes                   |
| Measurement method described           | Yes                    | Yes                   |
| Inclusion/exclusion criteria           | Yes                    | Yes                   |
| <b>Score (of 8)</b>                    | 50                     | 6                     |

|                                        |                       |
|----------------------------------------|-----------------------|
| Mir-409-3p                             | Song et al. 2021 (42) |
| Prospective                            | Yes                   |
| Biomarker evaluator blinded to outcome | No                    |
| Defined time period                    | Yes                   |
| Pre-defined clinical endpoints         | Yes                   |
| Sample size calculation                | No                    |
| Candidate variables                    | No                    |
| Measurement method described           | Yes                   |
| Inclusion/exclusion criteria           | Yes                   |
| <b>Score (of 8)</b>                    | 62.5                  |

|                                        |                        |
|----------------------------------------|------------------------|
| Mir-155                                | Zhang et al. 2020 (43) |
| Prospective                            | Yes                    |
| Biomarker evaluator blinded to outcome | No                     |
| Defined time period                    | Yes                    |
| Pre-defined clinical endpoints         | Yes                    |
| Sample size calculation                | Yes                    |

## Circulating miRNA-based biomarkers of ischemic stroke recovery

|                              |      |
|------------------------------|------|
| Candidate variables          | Yes  |
| Measurement method described | Yes  |
| Inclusion/exclusion criteria | Yes  |
| <b>Score (of 8)</b>          | 87.5 |

|                                        |                       |
|----------------------------------------|-----------------------|
| Mir-135b                               | Yang et al. 2020 (44) |
| Prospective                            | Yes                   |
| Biomarker evaluator blinded to outcome | No                    |
| Defined time period                    | Yes                   |
| Pre-defined clinical endpoints         | Yes                   |
| Sample size calculation                | No                    |
| Candidate variables                    | Yes                   |
| Measurement method described           | Yes                   |
| Inclusion/exclusion criteria           | Yes                   |
| <b>Score (of 8)</b>                    | 75                    |

|                                        |                      |
|----------------------------------------|----------------------|
| Mir-128                                | Liu et al. 2019 (45) |
| Prospective                            | Yes                  |
| Biomarker evaluator blinded to outcome | No                   |
| Defined time period                    | Yes                  |
| Pre-defined clinical endpoints         | Yes                  |
| Sample size calculation                | No                   |
| Candidate variables                    | Yes                  |
| Measurement method described           | Yes                  |
| Inclusion/exclusion criteria           | Yes                  |
| <b>Score (of 8)</b>                    | 75                   |

|                                        |                       |
|----------------------------------------|-----------------------|
| Mir-494                                | Zhao et al. 2020 (46) |
| Prospective                            | Yes                   |
| Biomarker evaluator blinded to outcome | No                    |
| Defined time period                    | No                    |
| Pre-defined clinical endpoints         | Yes                   |
| Sample size calculation                | No                    |



# Circulating miRNA-based biomarkers of ischemic stroke recovery

|                              |     |
|------------------------------|-----|
| Candidate variables          | No  |
| Measurement method described | Yes |
| Inclusion/exclusion criteria | Yes |
| <b>Score (of 8)</b>          | 50  |

|                                        |                               |
|----------------------------------------|-------------------------------|
| Mir-503                                | Sheikhbahaei et al. 2019 (47) |
| Prospective                            | Yes                           |
| Biomarker evaluator blinded to outcome | No                            |
| Defined time period                    | No                            |
| Pre-defined clinical endpoints         | Yes                           |
| Sample size calculation                | No                            |
| Candidate variables                    | Yes                           |
| Measurement method described           | Yes                           |
| Inclusion/exclusion criteria           | Yes                           |
| <b>Score (of 8)</b>                    | 62.5                          |

|                                        |                     |
|----------------------------------------|---------------------|
| Mir-451                                | Fu et al. 2019 (48) |
| Prospective                            | Yes                 |
| Biomarker evaluator blinded to outcome | No                  |
| Defined time period                    | No                  |
| Pre-defined clinical endpoints         | Yes                 |
| Sample size calculation                | No                  |
| Candidate variables                    | Yes                 |
| Measurement method described           | Yes                 |
| Inclusion/exclusion criteria           | Yes                 |
| <b>Score (of 8)</b>                    | 62.5                |

|                                        |                     |
|----------------------------------------|---------------------|
| Mir-27-3p                              | Ye et al. 2021 (49) |
| Prospective                            | Yes                 |
| Biomarker evaluator blinded to outcome | No                  |
| Defined time period                    | No                  |
| Pre-defined clinical endpoints         | Yes                 |

# Circulating miRNA-based biomarkers of ischemic stroke recovery

|                              |      |
|------------------------------|------|
| Sample size calculation      | No   |
| Candidate variables          | No   |
| Measurement method described | Yes  |
| Inclusion/exclusion criteria | No   |
| <b>Score (of 8)</b>          | 37.5 |

|                                        |                       |
|----------------------------------------|-----------------------|
| Mir-134                                | Zhou et al. 2018 (50) |
| Prospective                            | Yes                   |
| Biomarker evaluator blinded to outcome | No                    |
| Defined time period                    | Yes                   |
| Pre-defined clinical endpoints         | Yes                   |
| Sample size calculation                | No                    |
| Candidate variables                    | No                    |
| Measurement method described           | Yes                   |
| Inclusion/exclusion criteria           | Yes                   |
| <b>Score (of 8)</b>                    | 62.5                  |

|                                        |                       |
|----------------------------------------|-----------------------|
| Mir-146b                               | Chen et al. 2018 (51) |
| Prospective                            | Yes                   |
| Biomarker evaluator blinded to outcome | No                    |
| Defined time period                    | Yes                   |
| Pre-defined clinical endpoints         | Yes                   |
| Sample size calculation                | No                    |
| Candidate variables                    | No                    |
| Measurement method described           | Yes                   |
| Inclusion/exclusion criteria           | Yes                   |
| <b>Score (of 8)</b>                    | 62.5                  |

|                                        |                       |                       |
|----------------------------------------|-----------------------|-----------------------|
| Mir-223                                | Chen et al. 2017 (52) | Wang et al. 2014 (53) |
| Prospective                            | Yes                   | Yes                   |
| Biomarker evaluator blinded to outcome | No                    | No                    |
| Defined time period                    | No                    | Yes                   |
| Pre-defined clinical endpoints         | Yes                   | Yes                   |

# Circulating miRNA-based biomarkers of ischemic stroke recovery

|                              |      |     |
|------------------------------|------|-----|
| Sample size calculation      | No   | No  |
| Candidate variables          | Yes  | Yes |
| Measurement method described | Yes  | Yes |
| Inclusion/exclusion criteria | Yes  | Yes |
| <b>Score (of 8)</b>          | 62.5 | 75  |

|                                        |                        |
|----------------------------------------|------------------------|
| Mir-34a-5p                             | Liang et al. 2016 (54) |
| Prospective                            | Yes                    |
| Biomarker evaluator blinded to outcome | No                     |
| Defined time period                    | No                     |
| Pre-defined clinical endpoints         | Yes                    |
| Sample size calculation                | No                     |
| Candidate variables                    | No                     |
| Measurement method described           | Yes                    |
| Inclusion/exclusion criteria           | No                     |
| <b>Score (of 8)</b>                    | 37.5                   |

|                                        |                       |
|----------------------------------------|-----------------------|
| Mir-9-5p                               | Wang et al. 2021 (55) |
| Prospective                            | Yes                   |
| Biomarker evaluator blinded to outcome | No                    |
| Defined time period                    | No                    |
| Pre-defined clinical endpoints         | Yes                   |
| Sample size calculation                | No                    |
| Candidate variables                    | No                    |
| Measurement method described           | Yes                   |
| Inclusion/exclusion criteria           | Yes                   |
| <b>Score (of 8)</b>                    | 50                    |

|                                        |                      |
|----------------------------------------|----------------------|
| Mir-145                                | Jia et al. 2015 (56) |
| Prospective                            | Yes                  |
| Biomarker evaluator blinded to outcome | No                   |
| Defined time period                    | Yes                  |
| Pre-defined clinical endpoints         | Yes                  |

## Circulating miRNA-based biomarkers of ischemic stroke recovery

|                              |      |
|------------------------------|------|
| Sample size calculation      | No   |
| Candidate variables          | No   |
| Measurement method described | Yes  |
| Inclusion/exclusion criteria | Yes  |
| <b>Score (of 8)</b>          | 62.5 |

|                                        |                        |
|----------------------------------------|------------------------|
| Mir-140-5p                             | Liang et al. 2019 (57) |
| Prospective                            | Yes                    |
| Biomarker evaluator blinded to outcome | No                     |
| Defined time period                    | Yes                    |
| Pre-defined clinical endpoints         | Yes                    |
| Sample size calculation                | No                     |
| Candidate variables                    | Yes                    |
| Measurement method described           | Yes                    |
| Inclusion/exclusion criteria           | Yes                    |
| <b>Score (of 8)</b>                    | 75                     |

|                                        |                     |
|----------------------------------------|---------------------|
| Mir-22                                 | Hu et al. 2020 (58) |
| Prospective                            | Yes                 |
| Biomarker evaluator blinded to outcome | No                  |
| Defined time period                    | No                  |
| Pre-defined clinical endpoints         | Yes                 |
| Sample size calculation                | No                  |
| Candidate variables                    | Yes                 |
| Measurement method described           | Yes                 |
| Inclusion/exclusion criteria           | Yes                 |
| <b>Score (of 8)</b>                    | 62.5                |

|                                        |                      |
|----------------------------------------|----------------------|
| Mir-221-3p                             | Cui et al. 2021 (59) |
| Prospective                            | No                   |
| Biomarker evaluator blinded to outcome | No                   |
| Defined time period                    | No                   |
| Pre-defined clinical endpoints         | Yes                  |

# Circulating miRNA-based biomarkers of ischemic stroke recovery

|                              |      |
|------------------------------|------|
| Sample size calculation      | No   |
| Candidate variables          | Yes  |
| Measurement method described | No   |
| Inclusion/exclusion criteria | Yes  |
| <b>Score (of 8)</b>          | 37.5 |

|                                        |                       |
|----------------------------------------|-----------------------|
| Mir-210                                | Zeng et al. 2011 (60) |
| Prospective                            | Yes                   |
| Biomarker evaluator blinded to outcome | No                    |
| Defined time period                    | No                    |
| Pre-defined clinical endpoints         | Yes                   |
| Sample size calculation                | No                    |
| Candidate variables                    | No                    |
| Measurement method described           | Yes                   |
| Inclusion/exclusion criteria           | Yes                   |
| <b>Score (of 8)</b>                    | 50                    |

|                                        |                        |
|----------------------------------------|------------------------|
| Mir-146a                               | Kotb et al., 2019 (61) |
| Prospective                            | Yes                    |
| Biomarker evaluator blinded to outcome | No                     |
| Defined time period                    | yes                    |
| Pre-defined clinical endpoints         | Yes                    |
| Sample size calculation                | No                     |
| Candidate variables                    | No                     |
| Measurement method described           | Yes                    |
| Inclusion/exclusion criteria           | Yes                    |
| <b>Score (of 8)</b>                    | 62.5                   |

|                                        |                      |
|----------------------------------------|----------------------|
| Mir-99b                                | Wu et al., 2020 (62) |
| Prospective                            | Yes                  |
| Biomarker evaluator blinded to outcome | No                   |
| Defined time period                    | yes                  |
| Pre-defined clinical endpoints         | Yes                  |

## Circulating miRNA-based biomarkers of ischemic stroke recovery

|                              |      |
|------------------------------|------|
| Sample size calculation      | No   |
| Candidate variables          | No   |
| Measurement method described | Yes  |
| Inclusion/exclusion criteria | Yes  |
| <b>Score (of 8)</b>          | 62.5 |

|                                        |                      |
|----------------------------------------|----------------------|
| Mir-93                                 | Ma et al., 2019 (63) |
| Prospective                            | Yes                  |
| Biomarker evaluator blinded to outcome | yes                  |
| Defined time period                    | No                   |
| Pre-defined clinical endpoints         | Yes                  |
| Sample size calculation                | No                   |
| Candidate variables                    | No                   |
| Measurement method described           | Yes                  |
| Inclusion/exclusion criteria           | Yes                  |
| <b>Score (of 8)</b>                    | 62.5                 |

## Supplemental References

1. Xiang W, Tian C, Lin J, Wu X, Pang G, Zhou L, et al. Plasma let-7i and miR-15a expression are associated with the effect of recombinant tissue plasminogen activator treatment in acute ischemic stroke patients. *Thromb Res.* octombrie 2017;158:121–5.
2. Wang ZQ, Li K, Huang J, Huo TT, Lv PY. MicroRNA Let-7i Is a Promising Serum Biomarker for Post-stroke Cognitive Impairment and Alleviated OGD-Induced Cell Damage in vitro by Regulating Bcl-2. *Front Neurosci.* 24 martie 2020;14:215.
3. Jickling GC, Ander BP, Shroff N, Orantia M, Stamova B, Dykstra-Aiello C, et al. Leukocyte response is regulated by microRNA let7i in patients with acute ischemic stroke. *Neurology.* 22 noiembrie 2016;87(21):2198–205.

4. Wang J, Huang Q, Ding J, Wang X. Elevated serum levels of brain-derived neurotrophic factor and miR-124 in acute ischemic stroke patients and the molecular mechanism. *3 Biotech*. noiembrie 2019;9(11):386.
5. Yuan M, Guo YS, Zhang XX, Gao ZK, Shen XY, Han Y, et al. Diagnostic performance of miR-21, miR-124, miR-132, and miR-200b serums in post-stroke cognitive impairment patients. *Folia Neuropathol*. 2022;60(2):228–36.
6. Xie Z, Liu B, Zhou M, Chen Y. Expression and clinical significance of plasma miR-124 in acute ischemic stroke. *The Journal of Practical Medicine*. 2019;343–5.
7. Zhou X, Qi L. miR-124 Is Downregulated in Serum of Acute Cerebral Infarct Patients and Shows Diagnostic and Prognostic Value. *Clin Appl Thromb Hemost*. 26 octombrie 2021;27:10760296211035446.
8. Ji Q, Ji Y, Peng J, Zhou X, Chen X, Zhao H, et al. Increased Brain-Specific MiR-9 and MiR-124 in the Serum Exosomes of Acute Ischemic Stroke Patients. *PLoS One*. 2016;11(9):e0163645.
9. He XW, Shi YH, Liu YS, Li GF, Zhao R, Hu Y, et al. Increased plasma levels of miR-124-3p, miR-125b-5p and miR-192-5p are associated with outcomes in acute ischaemic stroke patients receiving thrombolysis. *Atherosclerosis*. octombrie 2019;289:36–43.
10. Qi Z, Zhao Y, Su Y, Cao B, Yang JJ, Xing Q. Serum Extracellular Vesicle-Derived miR-124-3p as a Diagnostic and Predictive Marker for Early-Stage Acute Ischemic Stroke. *Frontiers in Molecular Biosciences* [Internet]. 2021 [citat 2 septembrie 2022];8. Disponibil la: <https://www.frontiersin.org/articles/10.3389/fmolb.2021.685088>
11. Jin F, Xing J. Circulating pro-angiogenic and anti-angiogenic microRNA expressions in patients with acute ischemic stroke and their association with disease severity. *Neurol Sci*. noiembrie 2017;38(11):2015–23.
12. Jin F, Xing J. Circulating miR-126 and miR-130a levels correlate with lower disease risk, disease severity, and reduced inflammatory cytokine levels in acute ischemic stroke patients. *Neurol Sci*. octombrie 2018;39(10):1757–65.
13. Chen X, Zhang X, Su C, Huang S. Long noncoding RNA HULC in acute ischemic stroke: Association with disease risk, severity, and recurrence-free survival and relation with IL-6, ICAM1, miR-9, and miR-195. *J Clin Lab Anal*. 20 august 2020;34(11):e23500.
14. Yang G, Liu Z, Wang L, Chen X, Wang X, Dong Q, et al. MicroRNA-195 protection against focal cerebral ischemia by targeting CX3CR1. *J Neurosurg*. 1 noiembrie 2018;1–10.
15. Zhai Y, Zhu Z, Li H, Zhao C, Huang Y, Wang P. miR-195 and miR-497 in acute stroke and their correlations with post-stroke cognitive impairment. *Int J Clin Exp Pathol*. 1 decembrie 2020;13(12):3092–9.
16. Liu C, Huang H, Li Y, Zhao H. The relationship of long non-coding RNA maternally expressed gene 3 with microRNA-21 and their correlation with acute ischemic stroke risk, disease severity and recurrence risk. *Clin Neurol Neurosurg*. noiembrie 2021;210:106940.
17. Zhou J, Zhang J. Identification of miRNA-21 and miRNA-24 in plasma as potential early stage markers of acute cerebral infarction. *Mol Med Rep*. august 2014;10(2):971–6.

18. Wang Y, Huang J, Ma Y, Tang G, Liu Y, Chen X, et al. MicroRNA-29b is a therapeutic target in cerebral ischemia associated with aquaporin 4. *J Cereb Blood Flow Metab.* decembrie 2015;35(12):1977–84.
19. Guo C, Zhong C, Li Q, Gao Y, Li W, Ou Y. [Expressions and neural function prognostic evaluation of serum microRNA-24 and microRNA-29b in elderly patients with acute ischemic stroke]. *Zhonghua Wei Zhong Bing Ji Jiu Yi Xue.* ianuarie 2020;32(1):78–82.
20. Ma X, Yun HJ, Elkin K, Guo Y, Ding Y, Li G. MicroRNA-29b Suppresses Inflammation and Protects Blood-Brain Barrier Integrity in Ischemic Stroke. *Mediators of Inflammation.* 23 august 2022;2022:e1755416.
21. Li G, Ma X, Zhao H, Fan J, Liu T, Luo Y, et al. Long non-coding RNA H19 promotes leukocyte inflammation in ischemic stroke by targeting the miR-29b/C1QTNF6 axis. *CNS Neuroscience & Therapeutics.* 2022;28(6):953–63.
22. Abdelaleem OO, Shaker OG, Mohamed MM, Ahmed TI, Elkhateeb AF, Abdelghaffar NK, et al. Differential Expression of Serum TUG1, LINC00657, miR-9, and miR-106a in Diabetic Patients With and Without Ischemic Stroke. *Frontiers in Molecular Biosciences [Internet].* 2022 [citat 31 august 2022];8. Disponibil la: <https://www.frontiersin.org/articles/10.3389/fmolb.2021.758742>
23. Xue Y, Li M, Liu D, Zhu Q, Chen H. Expression of miR-9 in the serum of patients with acute ischemic stroke and its effect on neuronal damage. *Int J Clin Exp Pathol.* 2018;11(12):5885–92.
24. Kautzky V. Identifizierung von Einflussfaktoren auf die Konzentrationen der zirkulierenden microRNAs miR-125a-5p, miR-125b-5p und miR-143-3p nach ischämischem Schlaganfall [Internet] [Text.PhDThesis]. Ludwig-Maximilians-Universität München; 2022 [citat 9 octombrie 2022]. Disponibil la: <https://edoc.ub.uni-muenchen.de/29704/>
25. He XW, Shi YH, Zhao R, Liu YS, Li GF, Hu Y, et al. Plasma Levels of miR-125b-5p and miR-206 in Acute Ischemic Stroke Patients After Recanalization Treatment: A Prospective Observational Study. *J Stroke Cerebrovasc Dis.* iunie 2019;28(6):1654–61.
26. Yuan M, Yuan H, Zhou C, Liu F, Lin C, Tang Y. The significance of low plasma miR-335 level in patients with acute cerebral infarction may be associated with the loss of control of CALM1 expression. *Int J Clin Exp Med.* 2016;9(10):19595–601.
27. Zhao B, Zhu Z, Hao J, Wan Z, Guo X. Decreased plasma miR-335 expression in patients with acute ischemic stroke and its association with calmodulin expression. *J Int Med Res.* decembrie 2016;44(6):1331–8.
28. Guo C, Yao Y, Li Q, Gao Y, Cao H. Expression and Clinical Value of miR-185 and miR-424 in Patients with Acute Ischemic Stroke. *Int J Gen Med.* 4 ianuarie 2022;15:71–8.
29. Kijpaisalratana N, Nimsamer P, Khamwut A, Payungporn S, Pisitkun T, Chutinet A, et al. Serum miRNA125a-5p, miR-125b-5p, and miR-433-5p as biomarkers to differentiate between posterior circulation stroke and peripheral vertigo. *BMC Neurology.* 10 octombrie 2020;20(1):372.
30. Ma X, Liao X, Liu J, Wang Y, Wang X, Chen Y, et al. Circulating endothelial microvesicles and their carried miR-125a-5p: potential biomarkers for ischaemic stroke. *Stroke Vasc Neurol.* 15 septembrie 2022;svn.



31. Peng G, Yuan Y, Wu S, He F, Hu Y, Luo B. MicroRNA let-7e Is a Potential Circulating Biomarker of Acute Stage Ischemic Stroke. *Transl Stroke Res.* decembrie 2015;6(6):437–45.
32. Wu J, Fan CL, Ma LJ, Liu T, Wang C, Song JX, et al. Distinctive expression signatures of serum microRNAs in ischaemic stroke and transient ischaemic attack patients. *Thromb Haemost.* 3 mai 2017;117(5):992–1001.
33. Zeng L, Liu J, Wang Y, Wang L, Weng S, Chen S, et al. Cocktail blood biomarkers: prediction of clinical outcomes in patients with acute ischemic stroke. *Eur Neurol.* 2013;69(2):68–75.
34. Otero-Ortega L, Alonso-López E, Pérez-Mato M, Laso-García F, Gómez-de Frutos MC, Diekhorst L, et al. Circulating Extracellular Vesicle Proteins and MicroRNA Profiles in Subcortical and Cortical-Subcortical Ischaemic Stroke. *Biomedicines.* 7 iulie 2021;9(7):786.
35. Yang ZB, Li TB, Zhang Z, Ren KD, Zheng ZF, Peng J, et al. The Diagnostic Value of Circulating Brain-specific MicroRNAs for Ischemic Stroke. *Intern Med.* 2016;55(10):1279–86.
36. Zhu X, Ding J, Wang B, Wang J, Xu M. Circular RNA DLGAP4 is down-regulated and negatively correlates with severity, inflammatory cytokine expression and pro-inflammatory gene miR-143 expression in acute ischemic stroke patients. *Int J Clin Exp Pathol.* 1 martie 2019;12(3):941–8.
37. Niu M, Li H, Li X, Yan X, Ma A, Pan X, et al. Circulating Exosomal miRNAs as Novel Biomarkers Perform Superior Diagnostic Efficiency Compared With Plasma miRNAs for Large-Artery Atherosclerosis Stroke. *Front Pharmacol.* 26 noiembrie 2021;12:791644.
38. Huang S, Zhao J, Huang D, Zhuo L, Liao S, Jiang Z. Serum miR-132 is a risk marker of post-stroke cognitive impairment. *Neurosci Lett.* 26 februarie 2016;615:102–6.
39. Lin X, Wang W, Tao T, Zhang D, Mao L, He X. Synthetic role of miR-411-5p and CT perfusion information in predicting clinical outcomes after thrombolysis in acute cerebral infarction. *Acta Neurol Belg.* 6 august 2022;
40. Yuan M, Tang Y, Zhou C, Liu F, Chen L, Yuan H. Elevated plasma CaM expression in patients with acute cerebral infarction predicts poor outcomes and is inversely associated with miR-26b expression. *Int J Neurosci.* 2016;126(5):408–14.
41. Zhong C, Yin C, Niu G, Ning L, Pan J. MicroRNA miR-497 is closely associated with poor prognosis in patients with cerebral ischemic stroke. *Bioengineered.* 12(1):2851–62.
42. Song XD, Li SX, Zhu M. Plasma miR-409-3p promotes acute cerebral infarction via suppressing CTRP3. *Kaohsiung J Med Sci.* aprilie 2021;37(4):324–33.
43. Zhang H, Chen G, Qiu W, Pan Q, Chen Y, Chen Y, et al. Plasma endothelial microvesicles and their carrying miRNA-155 serve as biomarkers for ischemic stroke. *J Neurosci Res.* noiembrie 2020;98(11):2290–301.
44. Yang S, Zhan X, He M, Wang J, Qiu X. miR-135b levels in the peripheral blood serve as a marker associated with acute ischemic stroke. *Exp Ther Med.* iunie 2020;19(6):3551–8.
45. Liu P, Han Z, Ma Q, Liu T, Wang R, Tao Z, et al. Upregulation of MicroRNA-128 in the Peripheral Blood of Acute Ischemic Stroke Patients is Correlated with Stroke Severity Partially through Inhibition of Neuronal Cell Cycle Reentry. *Cell Transplant.* iulie 2019;28(7):839–50.

46. Zhao H, Li G, Wang R, Tao Z, Ma Q, Zhang S, et al. Silencing of microRNA-494 inhibits the neurotoxic Th1 shift via regulating HDAC2-STAT4 cascade in ischaemic stroke. *Br J Pharmacol.* ianuarie 2020;177(1):128–44.
47. Sheikhabaei S, Manizheh D, Mohammad S, Hasan TM, Saman N, Laleh R, et al. Can MiR-503 be used as a marker in diabetic patients with ischemic stroke? *BMC Endocr Disord.* 29 aprilie 2019;19(1):42.
48. Fu C, Chen S, Cai N, Liu Z, Wang P, Zhao J. Potential Neuroprotective Effect of miR-451 Against Cerebral Ischemia/Reperfusion Injury in Stroke Patients and a Mouse Model. *World Neurosurg.* octombrie 2019;130:e54–61.
49. Ye Z, Hu J, Xu H, Sun B, Jin Y, Zhang Y, et al. Serum Exosomal microRNA-27-3p Aggravates Cerebral Injury and Inflammation in Patients with Acute Cerebral Infarction by Targeting PPAR $\gamma$ . *Inflammation.* iunie 2021;44(3):1035–48.
50. Zhou J, Chen L, Chen B, Huang S, Zeng C, Wu H, et al. Increased serum exosomal miR-134 expression in the acute ischemic stroke patients. *BMC Neurol.* 4 decembrie 2018;18:198.
51. Chen Z, Wang K, Huang J, Zheng G, Lv Y, Luo N, et al. Upregulated Serum MiR-146b Serves as a Biomarker for Acute Ischemic Stroke. *Cell Physiol Biochem.* 2018;45(1):397–405.
52. Chen Y, Song Y, Huang J, Qu M, Zhang Y, Geng J, et al. Increased Circulating Exosomal miRNA-223 Is Associated with Acute Ischemic Stroke. *Front Neurol.* 2017;8:57.
53. Wang Y, Zhang Y, Huang J, Chen X, Gu X, Wang Y, et al. Increase of circulating miR-223 and insulin-like growth factor-1 is associated with the pathogenesis of acute ischemic stroke in patients. *BMC Neurol.* 8 aprilie 2014;14:77.
54. Liang T ying, Lou J yu. Increased Expression of mir-34a-5p and Clinical Association in Acute Ischemic Stroke Patients and in a Rat Model. *Med Sci Monit.* 22 august 2016;22:2950–5.
55. Wang Q, Wang F, Fu F, Liu J, Sun W, Chen Y. Diagnostic and prognostic value of serum miR-9-5p and miR-128-3p levels in early-stage acute ischemic stroke. *Clinics (Sao Paulo).* 2021;76:e2958.
56. Jia L, Hao F, Wang W, Qu Y. Circulating miR-145 is associated with plasma high-sensitivity C-reactive protein in acute ischemic stroke patients. *Cell Biochemistry and Function.* 2015;33(5):314–9.
57. Liang HB, He JR, Tu XQ, Ding KQ, Yang GY, Zhang Y, et al. MicroRNA-140-5p: A novel circulating biomarker for early warning of late-onset post-stroke depression. *J Psychiatr Res.* august 2019;115:129–41.
58. Hu J, Zhou W, Zhou Z, Yang Q, Xu J, Dong W. miR-22 and cerebral microbleeds in brainstem and deep area are associated with depression one month after ischemic stroke. *Braz J Med Biol Res.* 27 aprilie 2020;53(5):e9162.
59. Cui Y, Ma G, Kong F, Song L. Diagnostic Values of miR-221-3p in Serum and Cerebrospinal Fluid for Post-Stroke Depression and Analysis of Risk Factors. *Iranian Journal of Public Health.* iunie 2021;50(6):1241.
60. Zeng L, Liu J, Wang Y, Wang L, Weng S, Tang Y, et al. MicroRNA-210 as a novel blood biomarker in acute cerebral ischemia. *Front Biosci (Elite Ed).* 1 iunie 2011;3:1265–72.

61. Kotb HG, Ibrahim AH, Mohamed EF, Ali OM, Hassanein N, Badawy D, et al. The expression of microRNA 146a in patients with ischemic stroke: an observational study. *Int J Gen Med*. 9 august 2019;12:273–8.
62. Wu X, Zhang X, Li D, Zhu Z. Plasma level of miR-99b may serve as potential diagnostic and short-term prognostic markers in patients with acute cerebral infarction. *J Clin Lab Anal*. 22 ianuarie 2020;34(3):e23093.
63. Ma Q, Li G, Tao Z, Wang J, Wang R, Liu P, et al. Blood microRNA-93 as an indicator for diagnosis and prediction of functional recovery of acute stroke patients. *J Clin Neurosci*. aprilie 2019;62:121–7.
