# Supplementary material for: Circulating MicroRNAs and Extracellular Vesicle-Derived MicroRNAs as Predictors of Functional Recovery in Ischemic Stroke Patients: A Systematic Review and Meta-Analysis
Source: MDPI journal article supplement (doi:10.3390/ijms24010251), 2022-12-23
Supplement: s1 [file s1]

# Circulating miRNA-based biomarkers of ischemic stroke recovery

Table S1. Demographic data of included studies

| Study +ref                        | No patients recruited (stroke + controls)                                  | Inclusion criteria                                                                                                                                                                                  | Exclusion criteria                                                                                                                                                       | Demographic data (age/ sex) (stroke patients vs controls)                            | Differing comorbidities and lab parameters (p<0.05)                                     | Disability scale used                                             | Score mean at admission                                             |
|-----------------------------------|----------------------------------------------------------------------------|-----------------------------------------------------------------------------------------------------------------------------------------------------------------------------------------------------|--------------------------------------------------------------------------------------------------------------------------------------------------------------------------|--------------------------------------------------------------------------------------|-----------------------------------------------------------------------------------------|-------------------------------------------------------------------|---------------------------------------------------------------------|
| Ma et al, 2022 [1]                | 188 (72 AIS, 60 patients with high risk of stroke and 56 healthy controls) | -AIS diagnosis (clinical + CT/MRI)                                                                                                                                                                  | - infectious disease;<br>-history of autoimmune disease or cancer;<br>-peripheral vascular disease, cerebral hemorrhage, transient ischemic attack, cardiac dysfunction. | AIS: 69.54±13.69; At risk subjects: 68.64±10.14; Controls: 66.36±11.19<br>M:F= 43/29 | Hypertension, homocysteinemia, intima – media thickness, carotid atherosclerosis,       | NIHSS                                                             | NIHSS <7, 40 (55.56%).<br>NIHSS ≥ 7 32 (44.44%).                    |
| Peng et al., 2015 [2]             | 124 (72 AIS + 52 controls)                                                 | - first stroke<br>Diagnosis (clinical + CT/MRI)<br>-ages 55 to 75<br>-patient arrival at the hospital after 4.5 h but within 24 h<br>- NIHSS score 4 to 15,<br>- without hemorrhagic transformation | -recurrent stroke, tumors, abnormal renal or liver function, infectious diseases, immune diseases, blood disorders, psychiatric illness                                  | AIS: 72.4 (9.2) vs controls: 70.7 (7.5)<br>M:F=41/31                                 | No significant differences                                                              | NIHSS                                                             | 8.4±2.2                                                             |
| Wu et al., 2017 [3]               | 181 (50 AIS, 81 TIA patients and 50 healthy controls)                      | - focal neurological deficit lasting for more than 24 h<br>-AIS diagnosis (clinical + CT/MRI)                                                                                                       | -history of hemorrhagic infarction, peripheral arterial occlusive diseases, chronic liver/kidney disease, cancer                                                         | AIS: 60.1 (11.3) vs TIA 60.8 (11.3) vs Controls 58.3 (9.5)<br>M:F=160:67             | Hypertension<br>Glucose, TG, HDL-C, LDL-C<br>Antihypertensive drug use, Previous stroke | NIHSS on admission<br><br>BI at discharge<br><br>mRS at discharge | - 14.0 (10.0-17.0)<br><br>- 40.0 (25.0-85.0)<br><br>- 4.0 (3.0-4.0) |
| Kijpaaisal ratana et al. 2020 [4] | 23 AIS + central vertigo + 35 peripheral                                   | -age ≥45<br>- acute vertigo                                                                                                                                                                         | -Altered state of consciousness,<br>-BT > 100.4 °F,                                                                                                                      | AIS with central vertigo: 64.52 (11.80) vs Peripheral                                | Diabetes mellitus, History of myocardial infarction,                                    | NIHSS                                                             | 3 (2-6)                                                             |

# Circulating miRNA-based biomarkers of ischemic stroke recovery

|                          |                              |                                                                                                           |                                                                                                                                                                                                           |                                                                                                                           |                                                                                                                                                         |       |               |
|--------------------------|------------------------------|-----------------------------------------------------------------------------------------------------------|-----------------------------------------------------------------------------------------------------------------------------------------------------------------------------------------------------------|---------------------------------------------------------------------------------------------------------------------------|---------------------------------------------------------------------------------------------------------------------------------------------------------|-------|---------------|
|                          | vertigo without AIS          | -diagnosis of central vertigo caused by ischemic stroke<br>-hospital admission within 72 h of onset       | -WBC > 15,000 cell/ $\mu$ L,<br>-Serum creatinine > 2 mg/dl,<br>-Liver enzymes > 3 fold of upper normal limit, cirrhosis, active malignancy or autoimmune disease,<br>-concurrent intracranial pathology. | Vertigo: 63.69 (9.42)<br>AIS, M:F=18:5                                                                                    | Smoking, Hemoglobin, WBC count, Creatinine, Fasting blood sugar, HbA1C.                                                                                 |       |               |
| Kautzky et al., 2022 [5] | 80 (40 AIS+40 Controls)      | AIS diagnosis (clinical and imaging) within 24 h of onset                                                 | Infection, inflammatory disease, active malignancy, major surgery in the last 3 months, heparin treatment in the last 4 weeks, head trauma I the last 2 weeks                                             | Stroke: 74.7 $\pm$ 13.8<br>Controls: 70.2 $\pm$ 8.7;<br>Stroke: 55%<br>Controls: 40%                                      | Atrial fibrillation, peripheral artery disease, previous stroke<br>CRP, AST, glucose, monocytes<br>Albumin, total cholesterol, LDL, HDL, TG, hematocrit | NIHSS | 6.7 $\pm$ 5.7 |
| Zhu et al., 2019 [6]     | 340 (170 AIS + 170 controls) | - first AIS diagnosis (clinical +C T/MRI)<br>- age >18 years old;<br>- admission within 24 hours of onset | - intracranial hemorrhage, severe infection, inflammatory disease, malignancy, immunosuppressive treatment, pregnancy, lactation.                                                                         | -AIS: 64.9 $\pm$ 12.5 vs Controls: 63.9 $\pm$ 10.5<br>M:F= 124:46                                                         | No significant differences                                                                                                                              | NIHSS | 7.9 $\pm$ 3.4 |
| Niu et al., 2021 [7]     | 596 (453 AIS + 143 controls) | - admission within 72 h of onset<br>- AIS diagnosis (clinical +C T/CTA/MRI/MRA)                           | NR                                                                                                                                                                                                        | LAA (193): 62.9 (10.5),<br>SAO (155) 62.9 (11.8) As (105): 63.4 (9.6)<br>vs Controls (143) 64.7 (8.9)<br>AIS, M:F=241:212 | No significant differences                                                                                                                              | NIHSS | -             |

# Circulating miRNA-based biomarkers of ischemic stroke recovery

|                         |                                                               |                                                                                                                                                                                                                                          |                                                                                                                                                                                                                                                                                                        |                                                               |                                                            |                                  |         |
|-------------------------|---------------------------------------------------------------|------------------------------------------------------------------------------------------------------------------------------------------------------------------------------------------------------------------------------------------|--------------------------------------------------------------------------------------------------------------------------------------------------------------------------------------------------------------------------------------------------------------------------------------------------------|---------------------------------------------------------------|------------------------------------------------------------|----------------------------------|---------|
| Li et al., 2022 [8]     | 92 (50 AIS, 42 controls)                                      | -AIS diagnosis (clinical + DWI-MRI)<br>-first ischemic stroke<br>-age 18 – 80<br>-NIHSS<25 points<br>- admission within 6 h                                                                                                              | NR                                                                                                                                                                                                                                                                                                     | AIS patients: 18– 80 years                                    | No significant differences                                 | NIHSS                            |         |
| Kotb 2019 et al., [9]   | 44 stroke patients + 22 age and sex matched controls          | - age ≥ 18<br>- admission within 24 h of onset<br>- thrombotic stroke, anterior circulation                                                                                                                                              | - Intracerebral hemorrhage, hemorrhagic infarction,<br>- Extensive infarction, anticoagulant or thrombolytic treatment<br>-Other neurological disorders                                                                                                                                                | 63.69, 6.42 (62.50, 54.00) vs 81.00 +- 64.38 -6.23 (65.00,56) | Cholesterol, Hemoglobin, Platelets, Urea, Serum creatinine | GCS- short-term prognosis of ACI | NA      |
| Wu et al., 2020 [10]    | 112 ACI + 112 controls                                        | - first ischemic stroke within 6 hours after the symptom onset<br>- CT/MRI showing focal neurological deficits                                                                                                                           | - cancer, renal, cardiovascular disease, autoimmune disease                                                                                                                                                                                                                                            | 64.56 ± 6.03 vs 63.42 ± 5.71<br>M:F=68/44 vs 70/42            | BMI, Hypertension, Hyperlipidemia, Diabetes                | GOS- short-term prognosis of ACI | NA      |
| Huang et al., 2016 [11] | 76 IS patients (39 PSCI + 37 PSCN) vs 38 age-matched controls | - history of stroke and/or CT/MRI consistent with cerebrovascular disease<br>- cognitive impairment judged due to a vascular cause<br>- MoCA score <26<br>- first stroke event, and within 1 year<br>- conscious with stable vital signs | - other causes of cognitive impairment, long duration of cognitive impairment, treatment for cognitive impairment<br>- serious speech, vision, hearing impairment or psychiatric disorders, alcohol or drug abuse<br>- BDI Score > 13<br>- heart failure, respiratory failure, or other organ failure; | 66.2±88 vs 65.6±7.4<br>M:F=20/19                              | Diabetes, Hypertension                                     | MoCA score                       | 7.6±5.0 |

# Circulating miRNA-based biomarkers of ischemic stroke recovery

|                       |                              |                                                                                                                          |                                                                                                                                                                                                                                                                                                                                                                                                                         |                                         |                                                  |                                                                                              |                     |
|-----------------------|------------------------------|--------------------------------------------------------------------------------------------------------------------------|-------------------------------------------------------------------------------------------------------------------------------------------------------------------------------------------------------------------------------------------------------------------------------------------------------------------------------------------------------------------------------------------------------------------------|-----------------------------------------|--------------------------------------------------|----------------------------------------------------------------------------------------------|---------------------|
|                       |                              |                                                                                                                          | -pregnancy and lactation                                                                                                                                                                                                                                                                                                                                                                                                |                                         |                                                  |                                                                                              |                     |
| Zhai et al., [12]     | 108 vs 76 controls           | - AIS diagnosis<br><br>- admission within 72 h of onset                                                                  | - hemorrhagic stroke, -malignancy, - severe liver and kidney dysfunctions<br>- history of cerebral hemorrhage or head trauma surgery.<br>- acute or chronic infection or trauma<br>- cerebral infarction or myocardial infarction within 3 months<br>- hormone and anti-inflammatory drug use within 3 months<br>- difficult cooperation, cognitive and communication difficulties<br>- surgery or lost to follow-up no | 53.78±11.32 vs 54.07±11.18; M:F= 67: 39 | Family history of stroke, Diabetes, Hypertension | - NIHSS score in the patient group (P<0.05),<br>- MoCA score lower in patient group (P<0.05) | NA                  |
| Ma et al., 2019 [13]  | 33 AIS + 20 healthy controls | - first ischemic stroke<br>- admission within 6 h of onset<br>- NIHSS<25<br>- CT/MRI showing focal neurological deficits | - recurrent stroke<br>- hematological diseases, malignancy, renal or liver failure<br>- mental disorders, severe dementia, or coronary artery disease<br>- other diseases affecting the hemogram                                                                                                                                                                                                                        | NA                                      | No significant differences                       | NIHSS, BI, mRS                                                                               | NA                  |
| Lin et al., 2022 [14] | 96 AIS-59 FSTP & 37 NFSTP    | - NIHSS ≥ 4<br>- diagnosis (clinical and CT/CTP) within ≤ 4 h of onset                                                   | - contraindications to thrombolysis<br>- other associated disorders, brain trauma and brain tumor                                                                                                                                                                                                                                                                                                                       | 63.37 ± 7.09                            | No significant differences                       | NIHSS, mRS at 3 months                                                                       | NIHSS- 15.02 ± 5.27 |

# Circulating miRNA-based biomarkers of ischemic stroke recovery

|                                    |                                 |                                                                                                                                                                                  |                                                                                                                                                                                                                                                 |                                                                                                          |                               |                                      |                                  |
|------------------------------------|---------------------------------|----------------------------------------------------------------------------------------------------------------------------------------------------------------------------------|-------------------------------------------------------------------------------------------------------------------------------------------------------------------------------------------------------------------------------------------------|----------------------------------------------------------------------------------------------------------|-------------------------------|--------------------------------------|----------------------------------|
|                                    |                                 | - occlusion of MCA<br>M1, M2 / ICA on<br>CTA                                                                                                                                     | - anticoagulant<br>treatment, INR >1.5,<br>- no CT examination or<br>poor image quality<br>- no significant artery<br>occlusion<br>- mental disorders or<br>other diseases that<br>affect examination                                           |                                                                                                          |                               |                                      |                                  |
| Xiang et<br>al., 2017<br>[15]      | 86 (40 AIS+46<br>controls)      | AIS diagnosis<br>(clinical+CT)<br>age>18,<br>aspirin upon<br>admission,<br>NIHSS≥ 4,                                                                                             | Infection, severe liver,<br>kidney or<br>cardiopulmonary<br>disease, malignancy,<br>rheumatic<br>immune disease, TIA,<br>ICH,<br>previous AIS within<br>last 3 months                                                                           | Stroke:<br>63.1±11.7<br>Controls<br>65.5±11.4<br>controls;<br>Stroke: 63.0%<br>Controls: 61.5%           | NR                            | NIHSS                                | 12.0±6.2                         |
| Wang et<br>al. 2020<br>[16]        | 76 (36 PSCI +<br>38 no PSCI)    | history of a single<br>stroke episode within<br>the last year or<br>compatible imaging<br>imaging, cognitive<br>impairment judged of<br>vascular cause,<br>conscious and stable, | other causes of<br>cognitive impairment,<br>long duration of<br>cognitive impairment,<br>treatment for cognitive<br>impairment<br>, Beck Depression<br>Inventory Score >13,<br>alcohol or drug abuse,<br>organ failure,<br>pregnancy, lactation | PSCI: 67 (57–<br>72)<br>PSCN: 68 (52–<br>66)<br>(median and<br>range);<br>PSCI: 44.4%,<br>No PSCI: 39.5% | No significant<br>differences | MoCA<26 for<br>PSCI, ≥26 for<br>PSCN | PSCI: 19<br>±2.6 PSCN:<br>27±1.5 |
| Jickling<br>et al.<br>2016<br>[17] | 212 (106<br>IS+106<br>controls) | AIS diagnosis<br>(clinical+DWI-MRI)                                                                                                                                              | Active or recent<br>infection,<br>immunosuppression,<br>leukemia, lymphoma                                                                                                                                                                      | Stroke:<br>61.9±12.5<br>Controls: 60±13.8;<br>Stroke: 51.8%<br>Controls: 49.1%                           | No significant<br>differences | NIHSS                                | 5.3 (2–9)                        |

# Circulating miRNA-based biomarkers of ischemic stroke recovery

|                       |                           |                                                              |                                                                                                                                           |                                                                                                    |                                               |                                                        |                                          |
|-----------------------|---------------------------|--------------------------------------------------------------|-------------------------------------------------------------------------------------------------------------------------------------------|----------------------------------------------------------------------------------------------------|-----------------------------------------------|--------------------------------------------------------|------------------------------------------|
| Wang et al. 2019 [18] | 80 (40 IS+40 controls)    | AIS diagnosis                                                | Malignancy, autoimmune disease, “another unidentified disease”, short survival time                                                       | Stroke:63 (50–75)<br>Controls: 63 (50–75) (median and range);<br>Stroke: 55%<br>Controls: 52.5%    | BDNF                                          | NIHSS                                                  | 10 (5–15) (median and IQR)               |
| Yuan et al. 2022 [19] | 77 (45 PSCI, 32 PSCN)     | AIS diagnosis (clinical + CT/MRI), age>18, First AIS episode | Infection, other neurological disease, cancer, pregnancy                                                                                  | PSCI: 65.80±11.39<br>PSCN: 66.28±13.97;<br>PSCI:51.11%<br>PSCN:56.25%                              | Body weight                                   | MMSE≤24 for PSCI, MMSE>24 for PSCN<br>mRS at diagnosis | PSCI mRS 3.53±1.10<br>PSCN mRS 3.19±0.97 |
| Zhou and Qi 2021[20]  | 216 (108 IS+108 controls) | First AIS episode, diagnosis within 24 h                     | malignancy, severe liver and kidney disease, ICH                                                                                          | Stroke: 66.3±11.5<br>Controls: 64.5±12.8;<br>Stroke: 51.85%<br>Controls: 57.41%                    | BMI, total cholesterol, LDL, TG, Homocysteine | GOS at 30 days                                         | NR                                       |
| Ji et al. 2016 [21]   | 131 (65 IS+66 controls)   | AIS diagnosis (clinical + CT/MRI)                            | ICH, unknown stroke etiology                                                                                                              | Stroke: 64 (54–70)<br>Controls: 60 (53–64) (median and range);<br>Stroke: 61.5%<br>Controls: 54.5% | No significant differences                    | NIHSS                                                  | 8 (6-11) (median and IQR)                |
| He et al. 2019 [22]   | 94 (no controls)          | AIS patients receiving rt-PA within 4.5 h of onset           | Infection, severe kidney, liver, thyroid failure, rheumatic, or immune disease, hematologic disease and cancer, significant missing data. | 68.3±12.6;<br>70.2%                                                                                | No significant differences                    | NIHSS at diagnosis<br>mRS at 3 months                  | NIHSS: 5 (2-12) (median and IQR)         |

# Circulating miRNA-based biomarkers of ischemic stroke recovery

|                        |                            |                                                                                                                 |                                                                                                                  |                                                                                                                                 |                                        |                                    |                                  |
|------------------------|----------------------------|-----------------------------------------------------------------------------------------------------------------|------------------------------------------------------------------------------------------------------------------|---------------------------------------------------------------------------------------------------------------------------------|----------------------------------------|------------------------------------|----------------------------------|
| He et al. 2019 [23]    | 84 (no controls)           | AIS patients receiving rt-PA within 4.5 h of onset                                                              | Infection, severe kidney, liver, thyroid failure, rheumatic, or immune disease, hematologic disease and cancer,  | 68.1 ± 12.2<br>70.2%                                                                                                            | Smoking, Lipid-lowering medication use | NIHSS at diagnosis mRS at 3 months | NIHSS: 5 (2-12) (median and IQR) |
| Qi et al. 2021 [24]    | 20 (10 IS+10 controls)     | AIS patients receiving rt-PA within 6 h of onset                                                                | NR                                                                                                               | Stroke (grouped by serum collection timing):<br>• 2h:72.5 ± 7.2<br>• 4h:73.0 ± 6.8<br>• 6h: 75.6 ± 7.2<br>Controls: 65.2 ± 8.0; | NR                                     | NIHSS                              | NR                               |
| Jin and Xing 2017 [25] | 216 (106 IS +110 controls) | AIS diagnosis (clinical + CT/MRI/MRA)                                                                           | Infection, kidney or liver failure, malignancy, immunosuppression, thrombolysis                                  | Stroke: 60.8 ± 9.7 Controls: 58.6 ± 15.2;<br>Stroke: 45% Controls: 54%                                                          | No significant differences             | NIHSS                              | NR                               |
| Jin and Xing 2018 [26] | 296 (148 IS +148 controls) | AIS diagnosis (clinical + CT/MRI/MRA), age>18                                                                   | Infection, kidney or liver failure, malignancy, immunosuppression, thrombolysis                                  | Stroke: 61.5 ± 9.2 Controls: 59.8 ± 9.6;<br>Stroke: 62.2% Controls: 56.8%                                                       | No significant differences             | NIHSS                              | NR                               |
| Chen et al. 2020 [27]  | 430 (215 IS +215 controls) | age>18<br>Stroke: AIS diagnosis (clinical + CT/MRI) within 24 h of onset, Controls: at least 2 AIS risk factors | Severe infection, cerebral hemorrhage, epilepsy, malignancy, immunosuppression (<3 months), pregnancy, lactation | Stroke: 62.7 ± 11.0 Controls: 61.7 ± 9.3;<br>Stroke: 72.6% Controls: 76.7%                                                      | Hypertension, diabetes mellitus, CKD   | NIHSS                              | 8.2 ± 3.5                        |
| Yang et al. 2018 [28]  | 141 (96 IS + 45 controls)  | Stroke: AIS diagnosis (clinical + imaging) Controls: trauma and comorbidities, but                              | NR                                                                                                               | Stroke: 61.5 (53–71) (median and IQR) Controls: NR;                                                                             | NR                                     | NIHSS                              | 6 (2–11) (median and IQR)        |

# Circulating miRNA-based biomarkers of ischemic stroke recovery

|                          |                            | neurologically healthy                                                                                                          |                                                                                                                                                                                                                                                  | Stroke: 62.5%<br>Controls: NR                                                                      |                                                  |                                                          |                              |
|--------------------------|----------------------------|---------------------------------------------------------------------------------------------------------------------------------|--------------------------------------------------------------------------------------------------------------------------------------------------------------------------------------------------------------------------------------------------|----------------------------------------------------------------------------------------------------|--------------------------------------------------|----------------------------------------------------------|------------------------------|
| Zhai et al. 2020 [12]    | 184 (108 IS+76 controls)   | AIS diagnosis, diagnosis within 72 h of onset;                                                                                  | infection, hemorrhagic stroke, malignancy, history of brain hemorrhage or head trauma surgery, cerebral or myocardial infarction in the last 3 months<br>no hormones, no anti-inflammatory drugs (<3 months), no cognitive/communication barrier | Stroke: 53.78±11.32<br>Controls: 54.07±11.18;<br>Stroke: 62.04%<br>Controls: 51.32%                | Family history of stroke, diabetes, hypertension | NIHSS and MoCA                                           | NR                           |
| Liu et al. 2021 [29]     | 270 (170 IS +100 controls) | age>18<br>Stroke: AIS diagnosis (ASA criteria), no cerebral hemorrhagic infarction<br>Controls: at least 2 risk factors for AIS | Infection, malignancy, chronic inflammatory/immune diseases, pregnancy, lactation                                                                                                                                                                | Stroke: 66.7±9.8<br>Controls: 65.3±8.4;<br>Stroke: 70%<br>Controls: 66%                            | Hyperuricemia                                    | NIHSS                                                    | 10 (6–12) (median and IQR)   |
| Zhou and Zhang 2014 [30] | 89 (68 IS+21controls)      | Stroke: AIS diagnosis (clinical + MRI/MRA)<br>Controls: age-matched                                                             | Acute infection, malignancy, liver or kidney failure, immune diseases                                                                                                                                                                            | Stroke: 66 (55-76)<br>Controls: 58 (54-67) (median and range);<br>Stroke: 66.2%<br>Controls: 47.6% | NR                                               | NIHSS                                                    | NR                           |
| Wang et al. 2015 [31]    | 117 (58 IS+59 controls)    | Stroke: AIS diagnosis (clinical + imaging)<br>Controls: age and gender-matched                                                  | Acute infection, history of stroke, intracranial tumor, polytrauma, hematological diseases, kidney or liver failure, “other diseases                                                                                                             | Stroke: 61.7±6.3<br>Controls: 63.5±9.6;<br>Stroke: 75.9%<br>Controls: 69.5%                        | Hypertension, diabetes, and hyperlipidemia       | NIHSS at diagnosis<br>mRS at 3 months (<2: good outcome) | 4.22 (0-12) (mean and range) |



# Circulating miRNA-based biomarkers of ischemic stroke recovery

|                             |                                                                          |                                                                   | affecting the hemogram”                                                                                                                                                       |                                                                                                                                                                                                   |                                                                                                                                                  |       |                                                               |
|-----------------------------|--------------------------------------------------------------------------|-------------------------------------------------------------------|-------------------------------------------------------------------------------------------------------------------------------------------------------------------------------|---------------------------------------------------------------------------------------------------------------------------------------------------------------------------------------------------|--------------------------------------------------------------------------------------------------------------------------------------------------|-------|---------------------------------------------------------------|
| Ma et al. 2020 [32]         | 100 (60 IS+40 controls)                                                  | AIS diagnosis                                                     | NR                                                                                                                                                                            | NR; NR                                                                                                                                                                                            | No significant differences                                                                                                                       | NIHSS | NR                                                            |
| Abdelaleem et al. 2022 [33] | 223 (77 diabetics with stroke, 75 diabetics without stroke, 71 controls) | AIS diagnosis (clinical + CT/MRI)                                 | Acute infection, cerebral hemorrhage, recurrent stroke, family history of stroke, head trauma, hypertension, liver or kidney disease, immune diseases, hematological diseases | Diabetics with stroke: 57.08 ± 16.31<br>Diabetics without stroke: 53.19 ± 17.78<br>Controls: 54.58 ± 18.75;<br>Diabetics with stroke: 61.0%<br>Diabetics without stroke: 65.3%<br>Controls: 64.8% | Diabetics with stroke vs diabetics without stroke: BMI, fasting blood glucose, 2 h post-prandial glucose, LDL (higher for diabetics with stroke) | NIHSS | 11.38 ± 5.12                                                  |
| Xue et al. 2018 [34]        | 125 (65 IS+55Controls)                                                   | AIS diagnosis (clinical + CT/MRI) diagnosis within 24 h of onset  | NR                                                                                                                                                                            | Stroke: 65.2±6.7<br>Controls: 62.3±7.4;<br>Stroke: 61.5%<br>Controls: 50.9%                                                                                                                       | No significant differences                                                                                                                       | NIHSS | NR                                                            |
| Xie et al. 2019 [35]        | 80 (40 IS+40 Controls)                                                   | AIS diagnosis (clinical + MRI), infarction volume assessed by MRI | NR                                                                                                                                                                            | NR                                                                                                                                                                                                | NR                                                                                                                                               | NIHSS | NR                                                            |
| Guo et al. 2020 [36]        | 235 (170 IS +65 Controls)                                                | NA                                                                | NA                                                                                                                                                                            | NA                                                                                                                                                                                                | NA                                                                                                                                               | NIHSS | NA                                                            |
| Yuan et al., 2016 [37,38]   | 288 (152 IS+ 136 Controls)                                               | AIS diagnosis (clinical + MRI/MRA) within 24 h of onset           | - acute infection<br>- liver, kidney disease<br>- autoimmune disease<br>- malignancy<br>- pregnancy,                                                                          | 63.8 ± 11.4 vs 61.7 ± 11.8<br>M:F= 100/52 vs 88/48                                                                                                                                                | Smoking, hypertension, diabetes, dyslipidemia (LDL, HDL)                                                                                         | NIHSS | Patients with high scores (0.48 ± 0.25) and patients with low |

# Circulating miRNA-based biomarkers of ischemic stroke recovery

|                         |                             |                                                        |                                                                                                                                                                                                                                                                                                            |                                                   |                                               |       |                          |
|-------------------------|-----------------------------|--------------------------------------------------------|------------------------------------------------------------------------------------------------------------------------------------------------------------------------------------------------------------------------------------------------------------------------------------------------------------|---------------------------------------------------|-----------------------------------------------|-------|--------------------------|
|                         |                             |                                                        | - large artery atherosclerotic cerebral infarction<br>- Hospital stay $\leq$ 14 days.                                                                                                                                                                                                                      |                                                   |                                               |       | scores (0.74 $\pm$ 0.32) |
| Zhaou et al., 2016 [39] | 272 (168 IS + 104 Controls) | AIS diagnosis (clinical+ MRI/MRA) within 24 h of onset | recurrent stroke, blood disorders, acute infectious diseases, renal or liver failure, malignancy                                                                                                                                                                                                           | 70 $\pm$ 8 vs 69 $\pm$ 9<br>M:F= 88/80            | No significant differences                    | NIHSS | NR                       |
| Zhong et al., 2021 [40] | 128 (89 IS + 39 Controls)   | AIS patients                                           | - infectious disease or antibiotics within 3 months<br>- other cardiovascular and cerebrovascular diseases<br>- autoimmune disease<br>- psychiatric disorders<br><br>- malignancy<br>- organ dysfunction or treatment<br>- surgery within 3 months<br>- pregnancy, lactation<br>- life expectancy <1 month | 59.96 $\pm$ 7.24 vs 59.21 $\pm$ 7.18<br>M:F=46:43 | NR                                            | NIHSS | 20.39 $\pm$ 7.43         |
| Song et al., 2021 [41]  | 110 (80 IS + 30 Controls)   | AIS diagnosis (clinical + MRI)                         | - patients not receiving vasodilation or thrombolysis before blood sampling<br>- head trauma or surgery<br>- cancer, immune disorders                                                                                                                                                                      | 57.0 $\pm$ 21.1 vs 6.0 $\pm$ 20.9<br>M:F= 53/27   | Diabetes mellitus, Hyperlipidemia             | NIHSS | 7.89 $\pm$ 1.42          |
| Zhang et al., 2020 [42] | 163 (93 IS+70 Controls)     | -age 18–85<br>- AIS diagnosis (clinical + CT/ MRI)     | -Patients received rt-PA or thrombectomy                                                                                                                                                                                                                                                                   | 67.5 $\pm$ 11.2 vs 66.2 $\pm$ 10.8<br>M:F=57/36   | systolic blood pressure, glucose, lipoprotein | NIHSS |                          |

# Circulating miRNA-based biomarkers of ischemic stroke recovery

|                        |                                           |                                                                                                                                                             |                                                                                                                                                                                                                                         |                                                                        |                                                                      |              |            |
|------------------------|-------------------------------------------|-------------------------------------------------------------------------------------------------------------------------------------------------------------|-----------------------------------------------------------------------------------------------------------------------------------------------------------------------------------------------------------------------------------------|------------------------------------------------------------------------|----------------------------------------------------------------------|--------------|------------|
|                        |                                           |                                                                                                                                                             | -ICH or other intracranial pathology (vascular malformation, tumor, abscess, other nonischemic disease),<br>- prior stroke, myocardial infarction, atrial fibrillation, congestive heart failure<br>-pregnancy, lactation               |                                                                        | phospholipase A, intima-media thickness, homocysteine                |              |            |
| Zeng et al, 2013 [43]  | 105 (40 good outcomes + 65 poor outcomes) | AIS diagnosis (clinical + imaging)                                                                                                                          | prior stroke<br>abnormal liver, kidney function<br>- infectious diseases<br>- immune diseases<br>- malignancy                                                                                                                           | 66 (54-74) for good outcome group vs 68 (57-78) for poor outcome group | IL-6, FDP, PAI-1, differ between stroke patients with mRS≤2 vs mRS>2 | NIHSS, mRS   |            |
| Yang et al., 2020 [44] | 139 (79 AIS vs 60 healthy controls)       | - AIS diagnostic (clinical + CT/MRI)                                                                                                                        | - hemorrhagic stroke, brain trauma, hypertensive encephalopathy, encephalitis<br>- history of stroke or head trauma surgery<br>-other neurological diseases (meningitis, myelitis, epilepsy, multiple sclerosis)<br>- brain malignancy; | 54.68±10.98 vs 53.72±11.26<br>M:F=55/21                                | Hypertension, Hemocysteine level, Uric acid, FBG, Platelets, INR     | NIHSS        | 18.82±5.14 |
| Liu et al., 2019 [45]  | 65 (40 AIS + 25 healthy controls)         | - first ischemic<br>- AIS diagnosis (clinical + MRI)<br>- age 55–65<br>- admission within 72 h of onset;<br>-NIHSS 4–15;<br>- large-artery atherosclerosis. | NR                                                                                                                                                                                                                                      | 55–65                                                                  | No significant differences                                           | NIHSS<br>mRS |            |

# Circulating miRNA-based biomarkers of ischemic stroke recovery

|                                 |                                   |                                                                                                                 |                                                                                                                                                                                                                                                                         |                                                     |                            |                                   |                                                                                                                                                |
|---------------------------------|-----------------------------------|-----------------------------------------------------------------------------------------------------------------|-------------------------------------------------------------------------------------------------------------------------------------------------------------------------------------------------------------------------------------------------------------------------|-----------------------------------------------------|----------------------------|-----------------------------------|------------------------------------------------------------------------------------------------------------------------------------------------|
| Zhao et al., 2020 [46]          | 69 (43 AIS + 26 healthy controls) | - AIS diagnosis (clinical + MRI)                                                                                | - cerebral infarction secondary to other conditions<br>- diabetes mellitus, coronary artery disease, hypertension, kidney disease, hematological and autoimmune diseases                                                                                                | 60.41 ± 10.11 vs 57.96 ± 10.13, M:F= 54/22          | No significant differences | NIHSS                             |                                                                                                                                                |
| Sheikhba haei et al., 2019 [47] | 50 (33 AIS vs 17 controls)        | - AIS diagnosis (clinical + CT/MRI) within 72 h of onset                                                        | - history of GI and CNS tumors, - pulmonary, neurodegenerative, cardiovascular, autoimmune diseases<br>- prior stroke (<1 year),<br>- hemorrhagic transformation or AMI during hospital stay                                                                            | 67.9 ± 11.3 AIS vs 66.85 ± 11 controls<br>M:F=20/13 | NR                         | NIHSS<br>mRS acute<br>mRS chronic | 12 ± 5.25<br>3.35 ± 1.25<br>2.6 ± 3.4                                                                                                          |
| Guo et al., 2022 [48]           | 192 (142 AIS + 50 controls)       | - AIS diagnosis according to Chinese Stroke Association criteria and CT/MRI<br>- admission within 24 h of onset | - hemorrhagic stroke, traumatic brain injury, hypertensive encephalopathy, encephalitis, other cerebrovascular diseases.<br>- cardiopulmonary disease, multiple sclerosis, malignancy, hematological disease<br>- altered state of consciousness, psychiatric disorders | 52.40±2.35 vs 52.15±2.83<br>M:F=97:45               | No significant differences | NIHSS<br>mRS                      | 10.50±3.25 (good prognosis group)<br>17.62±3.58 (poor prognosis group)<br>1.42±0.28 (good prognosis group)<br>4.17±0.56 (poor prognosis group) |

# Circulating miRNA-based biomarkers of ischemic stroke recovery

|                                |                              |                                                                                                                                |                                                                                                                                                                                                                    |                                                               |                                                                                      |                                                                    |                                                                                                                              |
|--------------------------------|------------------------------|--------------------------------------------------------------------------------------------------------------------------------|--------------------------------------------------------------------------------------------------------------------------------------------------------------------------------------------------------------------|---------------------------------------------------------------|--------------------------------------------------------------------------------------|--------------------------------------------------------------------|------------------------------------------------------------------------------------------------------------------------------|
| Fu et al., 2019 [49]           | 205 (108 AIS + 97 controls)  | - AIS diagnosis (CT/MRI)                                                                                                       | - thrombolytic therapy, renal or liver failure, tumor, infectious disease, hematologic disease.                                                                                                                    | 64 ± 9.2 vs 59 ± 6.4<br>M:F=75/33                             | Diabetes, Cardiopathy                                                                | NIHSS                                                              | 3.86 (1, 12)                                                                                                                 |
| Ye et al., 2021 [50]           | 86 (43 AIS vs 43 controls)   | - AIS diagnosis (MRI)                                                                                                          | NR                                                                                                                                                                                                                 | 64.42 ± 10.25 vs 63.33 ± 14.32<br>M:F=22/21                   | No significant differences                                                           | NIHSS<br><br>mRS                                                   | 3.30 ± 1.67<br><br>mRS ≤ 2 28 (64.0%)<br>mRS > 2 15(36.0%)                                                                   |
| Otero-Ortega et al., 2021 [51] | 103 (81 AIS vs 22 controls)  | - age>18<br>- admission within 25 h of onset<br>- pre-stroke mRS ≤1<br>- SC or CSC lesion and compatible clinical presentation | -prior ischemic stroke, dementia, transient ischemic attack, brain tumor, cerebral hemorrhage,<br>- drug or alcohol abuse<br>- clinical conditions that precluded diagnosis<br>- participation in a clinical trial | CSC: 70.65 (15.39),<br>SC:61.65 (11.83) vs controls 61(12.74) | Hypertension, Dyslipidemia, Smoker, Atrial fibrillation, Charlson comorbidity index, | NIHSS at admission<br><br>NIHSS at 3 months<br><br>mRS at 3 months | CSC: 9.00 (9.75) and SC: 3.00 (3.25)<br><br>CSC: 0.00 (1.00) and SC: 0.00 (1.00)<br><br>CSC: 1.00 (2.00) and SC: 1.00 (2.00) |
| Yang et al., 2016 [52]         | 172 (114 AIS vs 58 controls) | - AIS diagnosis (clinical + CT/MRI )                                                                                           | - embolic brain infarction, transient ischemic attack, cerebrovascular malformation, subarachnoid hemorrhage, brain tumor<br>- severe systemic diseases (collagenosis, liver or renal)                             | 61±11.3 vs 56±3.9<br>M:F=78 (68.4)                            | Cholesterol, mmol/L, HDL-C, mmol/L, Hypertension, Diabetes mellitus, Smoking         | NIHSS                                                              |                                                                                                                              |

# Circulating miRNA-based biomarkers of ischemic stroke recovery

|                         |                               |                                                                       |                                                                                                                                                                                                    |                                               |                                                     |                                |                                         |
|-------------------------|-------------------------------|-----------------------------------------------------------------------|----------------------------------------------------------------------------------------------------------------------------------------------------------------------------------------------------|-----------------------------------------------|-----------------------------------------------------|--------------------------------|-----------------------------------------|
| Zhou et al., 2018 [53]  | 100 (50 AIS vs 50 controls)   | - AIS diagnosis (MRI)                                                 | NR                                                                                                                                                                                                 | 65.42 ± 10.25 vs 63.33 ± 14.32<br>M:F=26/24   | Diabetes mellitus, Hyperlipidemia                   | NIHSS score<br>mRS ≤2<br>mRS>2 | 7.82 ± 1.36<br>32 (64.0%)<br>18 (36.0%) |
| Chen et al., 2018 [54]  | 230 (128 AIS vs 102 controls) | - admission within 24 hours of onset<br>- age >18                     | - suspected infection<br>-thrombolytic or anticoagulant therapies<br>- ICH, transformation, other neurological complications,<br>- malignancy, - comorbidities, proinflammatory conditions         | 68.42±17.26 vs 65.36±16.32<br>M:F=109 (85.2%) | No significant differences                          | NIHSS                          | 6.2 (±7.4)                              |
| Chen et al., 2017 [55]  | 83 (50 AIS + 33 controls)     | - AIS diagnosis                                                       | - acute infectious disease<br>-recurrent stroke<br>- presentation within more than 72 h of onset<br>- renal or liver failure<br>- malignancy<br>- hematological disease<br>- difficult cooperation | 64 ± 9.4 vs 63 ± 7.9<br>M:F=32/18             | Diabetes mellitus, Cardiopathy                      | NIHSS<br>mRS≤2<br>mRS>2        | 3.32 (0.14)<br>30 (60.0%)<br>20 (40.0%) |
| Liang et al., 2016 [56] | 199 (102 AIS + 97 controls)   | -AIS diagnosis (clinical + CT/MRI)                                    | NR                                                                                                                                                                                                 | 65.1±10.0 vs 6.52 (51~68)<br>M:F= 69/33       | Hypertension, Diabetes, Hyperlipidemia, Cardiopathy | NIHSS                          | 3.95 (0, 20)                            |
| Wang et al., 2014 [57]  | 154 (79 AIS + 75 controls)    | -AIS diagnosis (CT/MRI/MRA)<br>-<72 h from onset to sample collection | - Acute infectious disease<br>- recurrent stroke, intracranial tumor, multiple trauma<br>- liver, kidney failure<br>- hematological disease, other diseases                                        | 65.1 ± 10.0 vs 62.5 ± 6.3<br>M:F=58/21        | Hypertension, Diabetes, Hyperlipidemia              | NIHSS                          | 3.95 (0, 20)                            |

# Circulating miRNA-based biomarkers of ischemic stroke recovery

|                         |                              |                                                                                                                                                | affecting the hemogram                                                                                                                                                                                                                                                                             |                                                                                                       |                                                                      |                                                                      |                                                                                                                                                                 |
|-------------------------|------------------------------|------------------------------------------------------------------------------------------------------------------------------------------------|----------------------------------------------------------------------------------------------------------------------------------------------------------------------------------------------------------------------------------------------------------------------------------------------------|-------------------------------------------------------------------------------------------------------|----------------------------------------------------------------------|----------------------------------------------------------------------|-----------------------------------------------------------------------------------------------------------------------------------------------------------------|
| Wang et al., 2021 [58]  | 176 (88 AIS vs 88 controls)  | - AIS diagnosis (clinical + CT /MRI)<br>- diagnosis within 6 h of onset<br>- age > 18                                                          | - history of ICH or intracranial tumor<br>- heart, liver and kidney failure,                                                                                                                                                                                                                       | 63.22±5.43 vs 62.42±3.64<br><br>M:F= 48/40                                                            | -BMI<br>Hypertension<br>Hyperlipidemia (HDL, LDL)<br>Diabetes<br>-   | mRS                                                                  | -                                                                                                                                                               |
| Jia et al., 2015 [59]   | 242 (146 AIS vs 96 controls) | Admission within 24 h of<br>- age > 18                                                                                                         | - suspected infection<br>-thrombolytic or anticoagulant therapies<br>- ICH, , transformation, other neurological complications,<br>- malignancy, - comorbidities, proinflammatory conditions                                                                                                       | 67.29 ± 14.16 vs 63.23 ± 15.24<br>Stroke: 112 (76.7%)                                                 | -                                                                    | NIHSS                                                                | 5.3 (±8.2)                                                                                                                                                      |
| Liang et al., 2019 [60] | 124 (62 AIS + 62 controls)   | - AIS diagnosis (clinical + CT/MRI) - Age > 18;<br>- admission within 7 days of s onset<br>- anticipated life expectancy of at least 6 months. | - history of major depressive disorder or other psychiatric disorders, family history of depression<br>- altered state of consciousness<br><br>- difficult cooperation due to aphasia, hearing impairment, severe comprehension or cognitive deficit<br>- other life-threatening or severe illness | Early onset PSD: 68.02 ± 9.86 vs Late-onset PSD: 66.89 ± 7.36<br>Controls: 65.56 ± 11.95<br>M:F=40:22 | Hypertension, Carotid Artery Stenosis, Fasting blood-glucose, HbA1c, | NIHSS<br><br><br><br><br><br>HAMD 2–3 weeks<br><br><br>HAMD 3 months | Early onset PSD: 4.86 ± 3.19<br><br>Late-onset PSD:4.21 ± 2.35<br><br>Early onset PSD: 9 [8,15]<br><br>Late-onset PSD: 4 [3,4]<br><br>Early onset PSD: 8 [7,11] |

# Circulating miRNA-based biomarkers of ischemic stroke recovery

|                              |                                              |                                                                                                                                                                |                                                                                                                                                                                                                                                   |                                                                                                                                   |                               |                   | Late-onset<br>PSD: 9<br>[9,10]                              |
|------------------------------|----------------------------------------------|----------------------------------------------------------------------------------------------------------------------------------------------------------------|---------------------------------------------------------------------------------------------------------------------------------------------------------------------------------------------------------------------------------------------------|-----------------------------------------------------------------------------------------------------------------------------------|-------------------------------|-------------------|-------------------------------------------------------------|
| Hu et. al,<br>2020<br>[61]   | 257 (73 PSD<br>group, 184 non-<br>PSD group) | -AIS diagnosis<br>byWHO-MONICA<br>criteria,<br>- MRI assessment<br>within 24 h of<br>admission;<br>- < 1 week from onset<br>to diagnosis;<br>- age > 18 years. | - psychiatric conditions<br>s significant cognitive<br>impairment, severe<br>aphasia or dysarthria,<br>visual or auditory<br>impairment<br>- metabolic<br>abnormalities<br>- tumors<br>- other medical illness<br>- patients without MRI<br>scans | PSD group:<br>62.7±10.1 vs<br>Non-PSD<br>group:<br>62.1±10.3<br>M:F= 151:72                                                       | BMI                           | NIHSS<br><br>HAMD | PSD group:<br>9 (7-12) vs<br>Non-PSD<br>group: 8 (6-<br>11) |
| Cui et<br>al., 2021<br>[62]  | 136 (76 PSD +<br>60 Non-PSD)                 | -initially confirmed<br>with stroke;                                                                                                                           | - acute infectious<br>disease<br>- other brain diseases<br>- malignancy<br><br>- hormone and anti-<br>inflammatory use in the<br>past 3 months<br>-cognitive impairment                                                                           | <45: PSD: 40<br>(52.63)<br>≥45: PSD: 36<br>(47.37)<br><45: Non-PSD:<br>28 (46.67) ≥45:<br>Non-PSD:<br>M:F=32 (53.33)<br>M:F=48:28 | History of mental<br>illness  | NIHSS<br><br>HAMD | 4.84±2.30<br><br>6.32±2.03                                  |
| Zeng et<br>al., 2011<br>[63] | 172 (112 AIS+<br>60 controls)                | AIS diagnosis<br>(clinical + DWI-MRI<br>and MRA)                                                                                                               | - prior stroke<br>- acute infectious<br>disease<br>- malignancy<br>- immune,<br>hematological disease<br>- liver, kidney failure                                                                                                                  | AIS: 68(57,76)<br>vs 67(64,73)<br>M:F= 78/34                                                                                      | No significant<br>differences | NIHSS             | 5 (1,10)                                                    |

Notes: Values denoted as  $a \pm b$  represent mean and standard deviation, those denoted as  $a$  ( $b$ ) denote median and interquartile range, those denoted as  $a$  ( $b$ - $c$ ) denote median and range. Significant differences for age and gender are marked. Abbreviations AIS, Acute ischemic stroke; ASA, American Stroke Association; AST, Aspartate aminotransferase; BDI, Beck Depression Inventory; BDNF, Brain derived neurotrophic factor; BI, Barthel Index; BI, Body Index; BMI, Body mass index; BT, Body temperature; CKD, Chronic kidney disease; CSC, Cortical-subcortical; CT, Computed tomography; CRP, C Reactive Protein; CTP, CT perfusion; DWI-MRI, Diffusion-weighted imaging-MRI; EMVs, Endothelial Microvesicles; FBG, fasting blood glucose; FDP, Fibrin degradation product; FSTP, Favorable short-term prognosis; GCS, Glasgow Coma Scale; GOS, Glasgow Outcome Scale; HbA1C, Glucose-bound (glycated) hemoglobin; HDL-C, HAMD, Hamilton depression scale; High-density



## Circulating miRNA-based biomarkers of ischemic stroke recovery

lipoprotein-cholesterol; ICH, intracerebral hemorrhage; IL-6, Interleukin-6; INR, International normalized ratio; LAA, Large-artery atherosclerosis; LDL-C, low-density lipoprotein cholesterol; MCA, Middle Cerebral Artery; MMSE, Mini-Mental State Examination; MoCA, Montreal Cognitive Assessment scale; miR, microRNAs; MRA, Magnetic Resonance Angiography; MRI: Magnetic resonance imaging; mRS, Modified Rankin score; NA, not applicable; NIHSS, National Institutes of Health Stroke Scale; NFSTP, Unfavorable short-term prognosis; NR, not reported; PAI-1, Plasminogen Activator Inhibitor 1; PSCI, post-stroke cognitive impairment; PSCN, post-stroke cognitive normality; PSD, Post-stroke depression; rt-PA, Recombinant tissue plasminogen activator; SAO, Small artery occlusion; SC, Subcortical; TG, Triglycerides; TIA, Transient ischemic attack; WBC, White blood cells;

## Supplemental references

1. Ma X, Liao X, Liu J, Wang Y, Wang X, Chen Y, et al. Circulating endothelial microvesicles and their carried miR-125a-5p: potential biomarkers for ischaemic stroke. *Stroke Vasc Neurol* [Internet]. BMJ Specialist Journals;
2. Peng G, Yuan Y, Wu S, He F, Hu Y, Luo B. MicroRNA let-7e Is a Potential Circulating Biomarker of Acute Stage Ischemic Stroke. *Transl Stroke Res*. 2015;6:437–45.
3. Wu J, Fan C-L, Ma L-J, Liu T, Wang C, Song J-X, et al. Distinctive expression signatures of serum microRNAs in ischaemic stroke and transient ischaemic attack patients. *Thromb Haemost*. 2017;117:992–1001.
4. Kijpaisalratana N, Nimsamer P, Khamwut A, Payungporn S, Pisitkun T, Chutinet A, et al. Serum miRNA125a-5p, miR-125b-5p, and miR-433-5p as biomarkers to differentiate between posterior circulation stroke and peripheral vertigo. *BMC Neurology*. 2020;20:372.
5. Kautzky V. Identifizierung von Einflussfaktoren auf die Konzentrationen der zirkulierenden microRNAs miR-125a-5p, miR-125b-5p und miR-143-3p nach ischämischem Schlaganfall [PhDThesis]. Ludwig-Maximilians-Universität München; 2022.
6. Zhu X, Ding J, Wang B, Wang J, Xu M. Circular RNA DLGAP4 is down-regulated and negatively correlates with severity, inflammatory cytokine expression and pro-inflammatory gene miR-143 expression in acute ischemic stroke patients. *Int J Clin Exp Pathol*. 2019;12:941–8.
7. Niu M, Li H, Li X, Yan X, Ma A, Pan X, et al. Circulating Exosomal miRNAs as Novel Biomarkers Perform Superior Diagnostic Efficiency Compared With Plasma miRNAs for Large-Artery Atherosclerosis Stroke. *Front Pharmacol*. 2021;12:791644.
8. Li G, Ma X, Zhao H, Fan J, Liu T, Luo Y, et al. Long non-coding RNA H19 promotes leukocyte inflammation in ischemic stroke by targeting the miR-29b/C1QTNF6 axis. *CNS Neuroscience & Therapeutics*. 2022;28:953–63.
9. Kotb HG, Ibrahim AH, Mohamed EF, Ali OM, Hassanein N, Badawy D, et al. The expression of microRNA 146a in patients with ischemic stroke: an observational study. *Int J Gen Med*. 2019;12:273–8.

## Circulating miRNA-based biomarkers of ischemic stroke recovery

10. Wu X, Zhang X, Li D, Zhu Z. Plasma level of miR-99b may serve as potential diagnostic and short-term prognostic markers in patients with acute cerebral infarction. *J Clin Lab Anal.* 2020;34:e23093.
11. Huang S, Zhao J, Huang D, Zhuo L, Liao S, Jiang Z. Serum miR-132 is a risk marker of post-stroke cognitive impairment. *Neurosci Lett.* 2016;615:102–6.
12. Zhai Y, Zhu Z, Li H, Zhao C, Huang Y, Wang P. miR-195 and miR-497 in acute stroke and their correlations with post-stroke cognitive impairment. *Int J Clin Exp Pathol.* 2020;13:3092–9.
13. Ma Q, Li G, Tao Z, Wang J, Wang R, Liu P, et al. Blood microRNA-93 as an indicator for diagnosis and prediction of functional recovery of acute stroke patients. *J Clin Neurosci.* 2019;62:121–7.
14. Lin X, Wang W, Tao T, Zhang D, Mao L, He X. Synthetic role of miR-411-5p and CT perfusion information in predicting clinical outcomes after thrombolysis in acute cerebral infarction. *Acta Neurol Belg.* 2022;
15. Xiang W, Tian C, Lin J, Wu X, Pang G, Zhou L, et al. Plasma let-7i and miR-15a expression are associated with the effect of recombinant tissue plasminogen activator treatment in acute ischemic stroke patients. *Thromb Res.* 2017;158:121–5.
16. Wang Z-Q, Li K, Huang J, Huo T-T, Lv P-Y. MicroRNA Let-7i Is a Promising Serum Biomarker for Post-stroke Cognitive Impairment and Alleviated OGD-Induced Cell Damage in vitro by Regulating Bcl-2. *Front Neurosci.* 2020;14:215.
17. Jickling GC, Ander BP, Shroff N, Orantia M, Stamova B, Dykstra-Aiello C, et al. Leukocyte response is regulated by microRNA let7i in patients with acute ischemic stroke. *Neurology.* 2016;87:2198–205.
18. Wang J, Huang Q, Ding J, Wang X. Elevated serum levels of brain-derived neurotrophic factor and miR-124 in acute ischemic stroke patients and the molecular mechanism. *3 Biotech.* 2019;9:386.
19. Yuan M, Guo Y-S, Zhang X-X, Gao Z-K, Shen X-Y, Han Y, et al. Diagnostic performance of miR-21, miR-124, miR-132, and miR-200b serums in post-stroke cognitive impairment patients. *Folia Neuropathol.* 2022;60:228–36.
20. Zhou X, Qi L. miR-124 Is Downregulated in Serum of Acute Cerebral Infarct Patients and Shows Diagnostic and Prognostic Value. *Clin Appl Thromb Hemost.* 2021;27:10760296211035446.
21. Ji Q, Ji Y, Peng J, Zhou X, Chen X, Zhao H, et al. Increased Brain-Specific MiR-9 and MiR-124 in the Serum Exosomes of Acute Ischemic Stroke Patients. *PLoS One.* 2016;11:e0163645.
22. He X-W, Shi Y-H, Liu Y-S, Li G-F, Zhao R, Hu Y, et al. Increased plasma levels of miR-124-3p, miR-125b-5p and miR-192-5p are associated with outcomes in acute ischaemic stroke patients receiving thrombolysis. *Atherosclerosis.* 2019;289:36–43.

## Circulating miRNA-based biomarkers of ischemic stroke recovery

23. He X-W, Shi Y-H, Zhao R, Liu Y-S, Li G-F, Hu Y, et al. Plasma Levels of miR-125b-5p and miR-206 in Acute Ischemic Stroke Patients After Recanalization Treatment: A Prospective Observational Study. *J Stroke Cerebrovasc Dis.* 2019;28:1654–61.
24. Qi Z, Zhao Y, Su Y, Cao B, Yang J-J, Xing Q. Serum Extracellular Vesicle–Derived miR-124-3p as a Diagnostic and Predictive Marker for Early-Stage Acute Ischemic Stroke. *Frontiers in Molecular Biosciences.* 2021;8.
25. Jin F, Xing J. Circulating pro-angiogenic and anti-angiogenic microRNA expressions in patients with acute ischemic stroke and their association with disease severity. *Neurol Sci.* 2017;38:2015–23.
26. Jin F, Xing J. Circulating miR-126 and miR-130a levels correlate with lower disease risk, disease severity, and reduced inflammatory cytokine levels in acute ischemic stroke patients. *Neurol Sci.* 2018;39:1757–65.
27. Chen X, Zhang X, Su C, Huang S. Long noncoding RNA HULC in acute ischemic stroke: Association with disease risk, severity, and recurrence-free survival and relation with IL-6, ICAM1, miR-9, and miR-195. *J Clin Lab Anal.* 2020;34:e23500.
28. Yang G, Liu Z, Wang L, Chen X, Wang X, Dong Q, et al. MicroRNA-195 protection against focal cerebral ischemia by targeting CX3CR1. *J Neurosurg.* 2018;1–10.
29. Liu C, Huang H, Li Y, Zhao H. The relationship of long non-coding RNA maternally expressed gene 3 with microRNA-21 and their correlation with acute ischemic stroke risk, disease severity and recurrence risk. *Clin Neurol Neurosurg.* 2021;210:106940.
30. Zhou J, Zhang J. Identification of miRNA-21 and miRNA-24 in plasma as potential early stage markers of acute cerebral infarction. *Mol Med Rep.* 2014;10:971–6.
31. Wang Y, Huang J, Ma Y, Tang G, Liu Y, Chen X, et al. MicroRNA-29b is a therapeutic target in cerebral ischemia associated with aquaporin 4. *J Cereb Blood Flow Metab.* 2015;35:1977–84.
32. Ma X, Yun HJ, Elkin K, Guo Y, Ding Y, Li G. MicroRNA-29b Suppresses Inflammation and Protects Blood-Brain Barrier Integrity in Ischemic Stroke. *Mediators of Inflammation.* Hindawi; 2022;2022:e1755416.
33. Abdelaleem OO, Shaker OG, Mohamed MM, Ahmed TI, Elkhateeb AF, Abdelghaffar NK, et al. Differential Expression of Serum TUG1, LINC00657, miR-9, and miR-106a in Diabetic Patients With and Without Ischemic Stroke. *Frontiers in Molecular Biosciences.* 2022;8.
34. Xue Y, Li M, Liu D, Zhu Q, Chen H. Expression of miR-9 in the serum of patients with acute ischemic stroke and its effect on neuronal damage. *Int J Clin Exp Pathol.* 2018;11:5885–92.
35. Xie Z, Liu B, Zhou M, Chen Y. Expression and clinical significance of plasma miR-124 in acute ischemic stroke. *The Journal of Practical Medicine.* 2019;343–5.
36. Guo C, Zhong C, Li Q, Gao Y, Li W, Ou Y. [Expressions and neural function prognostic evaluation of serum microRNA-24 and microRNA-29b in elderly patients with acute ischemic stroke]. *Zhonghua Wei Zhong Bing Ji Jiu Yi Xue.* 2020;32:78–82.

## Circulating miRNA-based biomarkers of ischemic stroke recovery

37. Yuan M, Yuan H, Zhou C, Liu F, Lin C, Tang Y. The significance of low plasma miR-335 level in patients with acute cerebral infarction may be associated with the loss of control of CALM1 expression. *Int J Clin Exp Med*. Madison: E-Century Publishing Corp; 2016;9:19595–601.
38. Yuan M, Tang Y, Zhou C, Liu F, Chen L, Yuan H. Elevated plasma CaM expression in patients with acute cerebral infarction predicts poor outcomes and is inversely associated with miR-26b expression. *Int J Neurosci*. 2016;126:408–14.
39. Zhao B, Zhu Z, Hao J, Wan Z, Guo X. Decreased plasma miR-335 expression in patients with acute ischemic stroke and its association with calmodulin expression. *J Int Med Res*. 2016;44:1331–8.
40. Zhong C, Yin C, Niu G, Ning L, Pan J. MicroRNA miR-497 is closely associated with poor prognosis in patients with cerebral ischemic stroke. *Bioengineered*. 2021;12:2851–62.
41. Song X-D, Li S-X, Zhu M. Plasma miR-409-3p promotes acute cerebral infarction via suppressing CTRP3. *Kaohsiung J Med Sci*. 2021;37:324–33.
42. Zhang H, Chen G, Qiu W, Pan Q, Chen Y, Chen Y, et al. Plasma endothelial microvesicles and their carrying miRNA-155 serve as biomarkers for ischemic stroke. *J Neurosci Res*. 2020;98:2290–301.
43. Zeng L, Liu J, Wang Y, Wang L, Weng S, Chen S, et al. Cocktail blood biomarkers: prediction of clinical outcomes in patients with acute ischemic stroke. *Eur Neurol*. 2013;69:68–75.
44. Yang S, Zhan X, He M, Wang J, Qiu X. miR-135b levels in the peripheral blood serve as a marker associated with acute ischemic stroke. *Exp Ther Med*. 2020;19:3551–8.
45. Liu P, Han Z, Ma Q, Liu T, Wang R, Tao Z, et al. Upregulation of MicroRNA-128 in the Peripheral Blood of Acute Ischemic Stroke Patients is Correlated with Stroke Severity Partially through Inhibition of Neuronal Cell Cycle Reentry. *Cell Transplant*. 2019;28:839–50.
46. Zhao H, Li G, Wang R, Tao Z, Ma Q, Zhang S, et al. Silencing of microRNA-494 inhibits the neurotoxic Th1 shift via regulating HDAC2-STAT4 cascade in ischaemic stroke. *Br J Pharmacol*. 2020;177:128–44.
47. Sheikhabaei S, Manizheh D, Mohammad S, Hasan TM, Saman N, Laleh R, et al. Can MiR-503 be used as a marker in diabetic patients with ischemic stroke? *BMC Endocr Disord*. 2019;19:42.
48. Guo C, Yao Y, Li Q, Gao Y, Cao H. Expression and Clinical Value of miR-185 and miR-424 in Patients with Acute Ischemic Stroke. *Int J Gen Med*. 2022;15:71–8.
49. Fu C, Chen S, Cai N, Liu Z, Wang P, Zhao J. Potential Neuroprotective Effect of miR-451 Against Cerebral Ischemia/Reperfusion Injury in Stroke Patients and a Mouse Model. *World Neurosurg*. 2019;130:e54–61.

## Circulating miRNA-based biomarkers of ischemic stroke recovery

50. Ye Z, Hu J, Xu H, Sun B, Jin Y, Zhang Y, et al. Serum Exosomal microRNA-27-3p Aggravates Cerebral Injury and Inflammation in Patients with Acute Cerebral Infarction by Targeting PPAR $\gamma$ . *Inflammation*. 2021;44:1035–48.
51. Otero-Ortega L, Alonso-López E, Pérez-Mato M, Laso-García F, Gómez-de Frutos MC, Diekhorst L, et al. Circulating Extracellular Vesicle Proteins and MicroRNA Profiles in Subcortical and Cortical-Subcortical Ischaemic Stroke. *Biomedicines*. 2021;9:786.
52. Yang Z-B, Li T-B, Zhang Z, Ren K-D, Zheng Z-F, Peng J, et al. The Diagnostic Value of Circulating Brain-specific MicroRNAs for Ischemic Stroke. *Intern Med*. 2016;55:1279–86.
53. Zhou J, Chen L, Chen B, Huang S, Zeng C, Wu H, et al. Increased serum exosomal miR-134 expression in the acute ischemic stroke patients. *BMC Neurol*. 2018;18:198.
54. Chen Z, Wang K, Huang J, Zheng G, Lv Y, Luo N, et al. Upregulated Serum MiR-146b Serves as a Biomarker for Acute Ischemic Stroke. *Cell Physiol Biochem*. 2018;45:397–405.
55. Chen Y, Song Y, Huang J, Qu M, Zhang Y, Geng J, et al. Increased Circulating Exosomal miRNA-223 Is Associated with Acute Ischemic Stroke. *Front Neurol*. 2017;8:57.
56. Liang T, Lou J. Increased Expression of mir-34a-5p and Clinical Association in Acute Ischemic Stroke Patients and in a Rat Model. *Med Sci Monit*. 2016;22:2950–5.
57. Wang Y, Zhang Y, Huang J, Chen X, Gu X, Wang Y, et al. Increase of circulating miR-223 and insulin-like growth factor-1 is associated with the pathogenesis of acute ischemic stroke in patients. *BMC Neurol*. 2014;14:77.
58. Wang Q, Wang F, Fu F, Liu J, Sun W, Chen Y. Diagnostic and prognostic value of serum miR-9-5p and miR-128-3p levels in early-stage acute ischemic stroke. *Clinics (Sao Paulo)*. 2021;76:e2958.
59. Jia L, Hao F, Wang W, Qu Y. Circulating miR-145 is associated with plasma high-sensitivity C-reactive protein in acute ischemic stroke patients. *Cell Biochemistry and Function*. 2015;33:314–9.
60. Liang H-B, He J-R, Tu X-Q, Ding K-Q, Yang G-Y, Zhang Y, et al. MicroRNA-140-5p: A novel circulating biomarker for early warning of late-onset post-stroke depression. *J Psychiatr Res*. 2019;115:129–41.
61. Hu J, Zhou W, Zhou Z, Yang Q, Xu J, Dong W. miR-22 and cerebral microbleeds in brainstem and deep area are associated with depression one month after ischemic stroke. *Braz J Med Biol Res*. 2020;53:e9162.
62. Cui Y, Ma G, Kong F, Song L. Diagnostic Values of miR-221-3p in Serum and Cerebrospinal Fluid for Post-Stroke Depression and Analysis of Risk Factors. *Iranian Journal of Public Health. Tehran University of Medical Sciences*; 2021;50:1241.
63. Zeng L, Liu J, Wang Y, Wang L, Weng S, Tang Y, et al. MicroRNA-210 as a novel blood biomarker in acute cerebral ischemia. *Front Biosci (Elite Ed)*. 2011;3:1265–72.
