# Supplementary material for: Circulating MicroRNAs and Extracellular Vesicle-Derived MicroRNAs as Predictors of Functional Recovery in Ischemic Stroke Patients: A Systematic Review and Meta-Analysis
Source: MDPI journal article supplement (doi:10.3390/ijms24010251), 2022-12-23
Supplement: s1 [file s1]

# Circulating miRNA-based biomarkers of ischemic stroke recovery

**Table S3-Correlational analysis of biomarkers associated with different recovery assessment scores**

| Author + Year (+ref)             | miRNA                   | miRNA source | miRNA collection time                             | Correlation coefficient (Spearman unless specified) | Sample size | Disability scale | Disability score timing       | Observations                                                                      |
|----------------------------------|-------------------------|--------------|---------------------------------------------------|-----------------------------------------------------|-------------|------------------|-------------------------------|-----------------------------------------------------------------------------------|
| Ma et al, 2022 [1]               | EMVs                    | Plasma       | <24 h                                             | 0.341                                               | 72          | NIHSS            | At admission (within 24 h)    | Pearson r<br>Opposite correlations for total EMVs and miR-125a-5p-loaded EMVs     |
|                                  | miR-125a-5p-loaded EMVs |              |                                                   | -0.276                                              | 72          | NIHSS            |                               |                                                                                   |
| Peng et al., 2015 [2]            | miR-let-7e              | Serum        | <24 h                                             | 0.29 (NS)                                           | 72          | NIHSS            | At admission (within 24 h)    |                                                                                   |
| Wu et al., 2017 [3]              | miR-23b-3p              | Serum        | <24 h                                             | 0.190                                               | 227         | NIHSS            | At admission (within 24 h)    |                                                                                   |
|                                  |                         |              |                                                   | 0.178                                               |             | mRS              | At discharge (within 12 days) |                                                                                   |
|                                  |                         |              |                                                   | -0.232                                              |             | BI               | At discharge (within 12 days) |                                                                                   |
|                                  | miR-29b-3p              | Serum        | <24 h                                             | 0.181                                               | 227         | NIHSS            | At admission (within 24 h)    |                                                                                   |
|                                  |                         |              |                                                   | -0.187                                              |             | BI               | At discharge (within 12 days) |                                                                                   |
|                                  | miR-181a-5p             | Serum        | <24 h                                             | 0.412                                               | 227         | NIHSS            | At admission (within 24 h)    |                                                                                   |
|                                  | miR-21-5p               | Serum        | <24 h                                             | 0.268                                               | 227         | NIHSS            | At admission (within 24 h)    |                                                                                   |
|                                  | miR-125a-5p             | Serum        | <72 h after central vertigo occurrence due to AIS | 0.239 (NS)                                          | 23          | NIHSS            | At admission (within 72 h)    | Posterior circulation stroke<br>Patients with central vertigo due to acute stroke |
| Kijpaaisalratana et al. 2020 [4] | miR-125b-5p             | Serum        |                                                   | -0.006 (NS)                                         |             | NIHSS            | At admission (within 72 h)    |                                                                                   |
|                                  | miR-433-5p              | Serum        |                                                   | 0.085 (NS)                                          |             | NIHSS            | At admission (within 72 h)    |                                                                                   |

# Circulating miRNA-based biomarkers of ischemic stroke recovery

|                          |                |                        |                                |              |     |               |                                                 |                                                                       |
|--------------------------|----------------|------------------------|--------------------------------|--------------|-----|---------------|-------------------------------------------------|-----------------------------------------------------------------------|
| Kautzky et al., 2022 [5] | miR-125b-5p    | Plasma                 | On admission                   | 0.39<br>0.56 | 40  | NIHSS<br>mRS  | Day 2<br>Day 7                                  | Kendall $\tau$                                                        |
| Zhu et al., 2019 [6]     | miR-143        | PBMC                   | < 24 h                         | 0.203        | 170 | NIHSS         | At admission (within 24 h)                      |                                                                       |
| Niu et al., 2021 [7]     | miR-369-3p     | Plasma                 | <72 h                          | -0.021 (NS)  | 453 | NIHSS         | At admission (within 72 h)                      | Exosomal                                                              |
|                          | miR-493-3p     | Plasma                 | <72 h                          | -0.183       | 453 | NIHSS         | At admission (within 72 h)                      | Exosomal                                                              |
|                          | and miR-379-5p | Plasma                 | <72 h                          | -0.068 (NS)  | 453 | NIHSS         | At admission (within 72 h)                      | Exosomal                                                              |
|                          | miR-1296-5p    | Plasma                 | <72 h                          | -0.185       | 453 | NIHSS         | At admission (within 72 h)                      | Exosomal                                                              |
| Li et al., 2022 [8]      | miR-29b        | Leukocytes             | <6 h                           | -0.491       | 50  | NIHSS         | At admission (within 6 h)                       | Pearson r<br>Anterior circulation stroke                              |
| Kotb et al., 2019 [9]    | miR-146a       | Serum                  | <24 h                          | -0.352       | 44  | GCS           | At admission (within 24 h)                      | Comatose patients with severe AIS                                     |
| Wu et al., 2020 [10]     | miR-99b        | Plasma                 | Unclear                        | -0.56        | 112 | GOS           | at day 30                                       | -                                                                     |
| Huang et al., 2016 [11]  | miR-132        | Serum                  | chronic                        | -0.859       | 76  | MoCA          | chronic                                         |                                                                       |
| Zhai et al., 2020 [12]   | miR-195        | Serum                  | At admission (within 72 hours) | 0.655        | 108 | NIHSS         | At admission (within 72 hours)                  | -                                                                     |
|                          |                |                        |                                | -0.773       |     | MoCA          |                                                 |                                                                       |
|                          | miR-497        | Serum                  |                                | 0.652        |     | NIHSS         |                                                 |                                                                       |
| Ma et al., 2019 [13]     |                |                        |                                | -0.773       |     | MoCA          |                                                 |                                                                       |
|                          | miR-93         | Neutrophils and plasma | < 6 h                          | 0.4124       | 33  | BI (p=0.0211) | At admission (<6 h) + 7 days after stroke onset | miR-93 expression in plasma correlates with expression in neutrophils |

# Circulating miRNA-based biomarkers of ischemic stroke recovery

|                           |            |                        |                                                                           |        |     |       |                                               |                                                                                               |
|---------------------------|------------|------------------------|---------------------------------------------------------------------------|--------|-----|-------|-----------------------------------------------|-----------------------------------------------------------------------------------------------|
| Lin et al., 2022 [14]     | miR-411-5p | Serum                  | before rt-PA, 24 h after rt-PA, and 3 months (90 days) after stroke onset | -0.470 | 96  | NIHSS | at 24 h after thrombolysis                    | Correlation between miR-411-5p expression and NIHSS after thrombolysis                        |
| Xiang et al. 2017 [15]    | let-7i     | plasma                 | 24 h after thrombolysis                                                   | 0.28   | 40  | NIHSS | at diagnosis                                  | Pearson r<br>Thrombolysis<br>Let-7i positively correlates with NIHSS score after thrombolysis |
| Wang et al. 2020 [16]     | let-7i     | serum                  | Chronic (within 1 year)                                                   | 0.643  | 36  | MoCA  | chronic (within 1 year)                       | Correlation sample included both PSCI and Non-PSCI patients                                   |
| Jickling et al. 2016 [17] | let-7i     | circulating leukocytes | <72h                                                                      | -0.38  | 106 | NIHSS | at diagnosis                                  | Pearson r                                                                                     |
| Wang et al. 2019 [18]     | miR-124    | serum                  | unclear                                                                   | 0.374  | 80  | NIHSS | at diagnosis (within 24 h after stroke onset) | Correlation sample included both patients and controls                                        |
| Yuan et al. 2022 [19]     | miR-21     | serum                  | 14 days                                                                   | 0.752  | 77  | MMSE  | 14 days                                       |                                                                                               |
|                           | miR-132    | serum                  | 14 days                                                                   | 0.319  | 77  | MMSE  | 14 days                                       |                                                                                               |
|                           | miR-200b   | serum                  | 14 days                                                                   | 0.379  | 77  | MMSE  | 14 days                                       |                                                                                               |
| Zhou and Qi 2021 [20]     | miR-124    | serum                  | 24, 48, 72 h                                                              | 0.5932 | 108 | GOS   | 30 days                                       |                                                                                               |
| Ji et al. 2016 [21]       | miR-124    | serum                  | mean 16.5 h                                                               | 0.6825 | 65  | NIHSS | at diagnosis                                  | Exosomal                                                                                      |
|                           | miR-9      | serum                  | mean 16.5 h                                                               | 0.7126 | 65  | NIHSS | at diagnosis                                  | Exosomal                                                                                      |
| He et al.                 | miR-124-3p | plasma                 | 24 h after thrombolysis                                                   | 0.382  | 84  | NIHSS | at diagnosis                                  | Thrombolysis                                                                                  |

# Circulating miRNA-based biomarkers of ischemic stroke recovery

|                              |             |        |                         |             |     |       |                                 |                                                                                             |
|------------------------------|-------------|--------|-------------------------|-------------|-----|-------|---------------------------------|---------------------------------------------------------------------------------------------|
| 2019<br>[22]                 | miR-125b-5p | plasma | 24 h after thrombolysis | 0.343       | 84  | NIHSS | at diagnosis                    | Thrombolysis                                                                                |
| He et al.<br>2019<br>[23]    | miR-125b-5p | plasma | 24 h after thrombolysis | 0.262       | 94  | NIHSS | On admission, at 24 h, on day 7 | Thrombolysis                                                                                |
|                              | miR-206     | plasma | 24 h after thrombolysis | 0.341       | 94  | NIHSS | On admission, at 24 h, on day 7 | Thrombolysis<br>miR-206 positively correlates with NIHSS scores on day 7 after thrombolysis |
| Qi et al.<br>2021<br>[24]    | miR-124-3p  | serum  | 2, 4, 6 h               | -0.74       | 20  | NIHSS | at diagnosis                    | Pearson r exosomal                                                                          |
| Jin and Xing<br>2018<br>[25] | miR-126     | plasma | <24 h                   | -0.402      | 148 | NIHSS | at diagnosis                    | Probable patient overlap with Jin and Xing 2017 [26]                                        |
|                              | miR-218     | plasma | <24 h                   | 0.471       | 148 | NIHSS | at diagnosis                    |                                                                                             |
|                              | miR-130a    | plasma | <24 h                   | -0.161 (NS) | 148 | NIHSS | At diagnosis                    |                                                                                             |
|                              | miR-185     | plasma | <24 h                   | -0.129 (NS) | 148 | NIHSS | At diagnosis                    |                                                                                             |
|                              | miR-222     | plasma | <24 h                   | -0.062 (NS) | 148 | NIHSS | At diagnosis                    |                                                                                             |
| Jin and Xing<br>2017<br>[26] | miR-126     | plasma | <24 h                   | -0.398      | 106 | NIHSS | at diagnosis                    | After thrombolysis                                                                          |
|                              | miR-222     | plasma | <24 h                   | 0.698       | 106 | NIHSS | at diagnosis                    | After thrombolysis                                                                          |
|                              | miR-19a     | plasma | <24 h                   | -0.026 (NS) | 106 | NIHSS | At diagnosis                    | After thrombolysis                                                                          |
|                              | miR-296     | plasma | <24 h                   | 0.020 (NS)  | 106 | NIHSS | At diagnosis                    | After thrombolysis                                                                          |
|                              | miR-101     | plasma | <24 h                   | -0.079 (NS) | 106 | NIHSS | At diagnosis                    | After thrombolysis                                                                          |
|                              | miR-218     | plasma | <24 h                   | 0.099 (NS)  | 106 | NIHSS | At diagnosis                    | After thrombolysis                                                                          |
|                              | miR-206     | plasma | <24 h                   | 0.069 (NS)  | 106 | NIHSS | At diagnosis                    | After thrombolysis                                                                          |
|                              | miR-221     | plasma | <24 h                   | 0.033 (NS)  | 106 | NIHSS | At diagnosis                    | After thrombolysis                                                                          |
|                              | miR-378     | plasma | <24 h                   | -0.557      | 106 | NIHSS | at diagnosis                    | After thrombolysis                                                                          |

# Circulating miRNA-based biomarkers of ischemic stroke recovery

|                             |          |             |              |            |     |       |              |                                          |
|-----------------------------|----------|-------------|--------------|------------|-----|-------|--------------|------------------------------------------|
|                             | miR-185  | plasma      | <24 h        | 0.171 (NS) | 106 | NIHSS | at diagnosis | After thrombolysis                       |
|                             | miR-130a | plasma      | <24 h        | 0.013 (NS) | 106 | NIHSS | at diagnosis | After thrombolysis                       |
| Chen et al. 2020 [27]       | miR-195  | plasma      | <24 h        | −0.139     | 215 | NIHSS | at diagnosis | -                                        |
|                             | miR-9    | plasma      | <24 h        | −0.335     | 215 | NIHSS | at diagnosis |                                          |
| Yang et al. 2018 [28]       | miR-195  | plasma      | <72 h        | −0.3684    | 96  | NIHSS | at diagnosis |                                          |
| Liu et al. 2021 [29]        | miR-21   | PBMCs+serum | at diagnosis | −0.284     | 170 | NIHSS | at diagnosis |                                          |
| Zhou and Zhang 2014 [30]    | miR-21   | plasma      | at diagnosis | −0.703     | 68  | NIHSS | at diagnosis |                                          |
| Wang et al. 2015 [31]       | miR-29b  | WBCs        | <72 h        | −0.349     | 58  | NIHSS | at 3 months  |                                          |
| Ma et al. 2022 [32]         | miR-29b  | neutrophils | <6 h         | −0.547     | 60  | NIHSS | at diagnosis |                                          |
| Abdelaleem et al. 2022 [33] | miR-9    | serum       | unclear      | 0.681      | 77  | NIHSS | at diagnosis | Patients with stroke and type 2 diabetes |
| Xue et al. 2018 [34]        | miR-9    | serum       | unclear      | 0.627      | 65  | NIHSS | at diagnosis |                                          |
| Xie et al. 2019 [35]        | miR-124  | plasma      | unclear      | −0.567     | 40  | NIHSS | unclear      |                                          |
|                             | miR-24   | Serum       | unclear      | −0.758     | 170 | NIHSS | unclear      |                                          |

# Circulating miRNA-based biomarkers of ischemic stroke recovery

|                                 |            |             |                                         |         |     |                 |                                     |                                                                                                                                                                                      |
|---------------------------------|------------|-------------|-----------------------------------------|---------|-----|-----------------|-------------------------------------|--------------------------------------------------------------------------------------------------------------------------------------------------------------------------------------|
| Guo et al., 2020 [36]           | miR-29b    | Serum       | NA (abstract only)                      | -0.794  | 170 | NIHSS           | NA (abstract only)                  | Pearson r                                                                                                                                                                            |
| Yuan et al., 2016 [37]          | miR-335    | Plasma      | < 24 h following patient admission      | -0.680  | 152 | NIHSS           | at admission                        | Pearson r<br>Time from onset to admission <14 days                                                                                                                                   |
| Yuan et al., 2016 [38]          | miR-26b    | Plasma      | < 24 h following patient admission      | -0.660  | 152 | NIHSS           | at admission                        | Pearson r<br>Time from onset to admission <14 days                                                                                                                                   |
| Zhao et al., 2016 [39]          | miR-335    | Plasma      | < 24 h                                  | -0.3682 | 168 | NIHSS           | At admission                        | Pearson r                                                                                                                                                                            |
| Zhong et al., 2021 [40]         | miR-497    | Serum       | At admission and at discharge           | -0.611  | 128 | NIHSS           | At admission and clinical discharge | Intravenous thrombolysis or mechanical thrombectomy                                                                                                                                  |
| Song et al., 2021 [41]          | miR-409-3p | Serum       | <9 h                                    | 0.865   | 80  | NIHSS           | Unclear                             |                                                                                                                                                                                      |
| Yang et al., 2020 [42]          | miR-135b   | Serum       | < 24 h and at day 14 after stroke onset | -0.835  | 79  | NIHSS           | Unclear                             |                                                                                                                                                                                      |
| Liu et al., 2019 [43]           | miR-128    | Lymphocytes | < 72 h                                  | 0.3944  | 40  | NIHSS           | at 7 days                           |                                                                                                                                                                                      |
|                                 |            |             |                                         | 0.4357  |     | mRS             | at 90 days                          |                                                                                                                                                                                      |
| Zhao et al., 2020 [44]          | miR-494    | Lymphocytes | < 6h                                    | 0.3339  | 43  | NIHSS           | <6h                                 |                                                                                                                                                                                      |
| Sheikhba haei et al., 2019 [45] | MiR-503    | Serum       | < 72 h + 3 months                       | 0.45    | 50  | NIHSS           | < 72 h                              | Correlation sample included patients with diabetes and without stroke, diabetic patients with stroke, stroke patients without diabetes<br>Higher disability at 3 months for patients |
|                                 |            |             |                                         | 0.48    |     | acute phase mRS | < 72 h                              |                                                                                                                                                                                      |

# Circulating miRNA-based biomarkers of ischemic stroke recovery

|                         |             |            |                       |        |     |       |                                                      | with higher initial expression of miR-503 |
|-------------------------|-------------|------------|-----------------------|--------|-----|-------|------------------------------------------------------|-------------------------------------------|
| Guo et al., 2022 [46]   | miR-185     | Serum      | <24 h                 | 0.735  | 142 | NIHSS | <24h                                                 |                                           |
|                         |             |            |                       | 0.802  |     | mRS   | <24h                                                 |                                           |
|                         | miR-424     | Serum      | <24 h                 | 0.796  | 142 | NIHSS | <24h                                                 |                                           |
|                         |             |            |                       | 0.873  |     | mRS   | <24h                                                 |                                           |
| Fu et al., 2019 [47]    | miR-451     | Unknown    | <12 hours             | 0.6104 | 108 | NIHSS | 3 months                                             |                                           |
| Ye et al., 2021 [48]    | miRNA-27-3p | Serum      | On hospital admission | 0.7320 | 86  | NIHSS | On hospital admission                                | Exosomal                                  |
| Yang et al, 2016 [49]   | miR-107     | Plasma     | <24 h                 | 0.52   | 114 | NIHSS | <24 h                                                |                                           |
|                         | miR-128b    | Plasma     | <24 h                 | 0.44   | 114 | NIHSS | <24 h                                                |                                           |
|                         | miR-153     | Plasma     | <24 h                 | 0.35   | 114 | NIHSS | <24 h                                                |                                           |
| Zhou et al., 2018 [50]  | miR-134     | Serum      | at 24-, 48- and 72 h  | 0.6079 | 50  | NIHSS | At admission (<24 h)                                 | Exosomal                                  |
| Chen et al., 2018 [51]  | miR-146b    | Serum      | < 24 h                | 0.6460 | 128 | NIHSS | at admission (<24 h) and 24 hours after stroke onset |                                           |
| Chen et al., 2017 [52]  | miR-223     | Serum      | < 72 h                | 0.31   | 50  | NIHSS | at admission (<72 h)                                 | Exosomal                                  |
| Liang et al., 2016 [53] | mir-34a-5p  | Plasma     | < 12 h                | -0.692 | 102 | NIHSS | At admission                                         |                                           |
| Wang et al., 2014 [54]  | miR-223     | Leucocytes | At 24, 48, 72 h       | -0.531 | 79  | NIHSS | At admission (<72 h)                                 |                                           |
|                         | miR-9-5p    | Serum      | <6 h                  | 0.066  | 88  | mRS   | At admission (<6 h)                                  |                                           |

## Circulating miRNA-based biomarkers of ischemic stroke recovery

|                         |            |        |                   |        |     |       |                                          |
|-------------------------|------------|--------|-------------------|--------|-----|-------|------------------------------------------|
| Wang et al., 2021 [55]  | miR-128-3p | Serum  | <6 h              | 0.082  | 88  | mRS   | At admission (<6 h)                      |
| Jia et al., 2015 [56]   | miR-145    | Serum  | <24 h             | 0.6288 | 146 | NIHSS | At admission and 24 h after stroke onset |
| Liang et al., 2019 [57] | miR-140-5p | Plasma | <24 h             | 0.4625 | 62  | HAMD  | 3 months                                 |
| Hu et. al, 2020 [58]    | miR-22     | Plasma | < 7 days          | 0.635  | 73  | HAMD  | 1 month                                  |
| Cui et al., 2021 [59]   | miR-221-3p | Serum  | Chronic (unknown) | 0.620  | 136 | NIHSS | Chronic (unknown)                        |
|                         |            |        |                   | 0.608  | 136 | HAMD  | Chronic (unknown)                        |

Notes: Jin and Xing 2018 is a follow-up study of Jin and Xing 2017, overlapping study periods, being performed in the same medical center and having very similar results ( $I^2=0\%$ ). We presume that patients from the first study were included in the second. Studies with *unclear* miRNA collection timing do not explicitly state the timing of blood collection, but it is reasonable to presume that it was collected in the acute phase (i.e. within hours or days of hospital admission). Abbreviations: AIS, Acute ischemic stroke; BI, Barthel Index; EMVs, Endothelial Microvesicles; GCS, Glasgow Coma Scale; GOS, Glasgow Outcome Scale; MMSE, Mini-Mental State Examination; MoCA, Montreal Cognitive Assessment; miR, microRNAs; mRS, Modified Rankin score; NIHSS, National Institute Health Stroke Score

## Supplemental references

1. Ma X, Liao X, Liu J, Wang Y, Wang X, Chen Y, et al. Circulating endothelial microvesicles and their carried miR-125a-5p: potential biomarkers for ischaemic stroke. *Stroke Vasc Neurol.*; 2022;svn-2021-001476
2. Peng G, Yuan Y, Wu S, He F, Hu Y, Luo B. MicroRNA let-7e Is a Potential Circulating Biomarker of Acute Stage Ischemic Stroke. *Transl Stroke Res.* 2015;6:437–45.
3. Wu J, Fan C-L, Ma L-J, Liu T, Wang C, Song J-X, et al. Distinctive expression signatures of serum microRNAs in ischaemic stroke and transient ischaemic attack patients. *Thromb Haemost.* 2017;117:992–1001.
4. Kijpaisalratana N, Nimsamer P, Khamwut A, Payungporn S, Pisitkun T, Chutinet A, et al. Serum miRNA125a-5p, miR-125b-5p, and miR-433-5p as biomarkers to differentiate between posterior circulation stroke and peripheral vertigo. *BMC Neurology.* 2020;20:372.



## Circulating miRNA-based biomarkers of ischemic stroke recovery

5. Kautzky V. Identifizierung von Einflussfaktoren auf die Konzentrationen der zirkulierenden microRNAs miR-125a-5p, miR-125b-5p und miR-143-3p nach ischämischem Schlaganfall [PhDThesis]. Ludwig-Maximilians-Universität München; 2022.
6. Zhu X, Ding J, Wang B, Wang J, Xu M. Circular RNA DLGAP4 is down-regulated and negatively correlates with severity, inflammatory cytokine expression and pro-inflammatory gene miR-143 expression in acute ischemic stroke patients. *Int J Clin Exp Pathol*. 2019;12:941–8.
7. Niu M, Li H, Li X, Yan X, Ma A, Pan X, et al. Circulating Exosomal miRNAs as Novel Biomarkers Perform Superior Diagnostic Efficiency Compared With Plasma miRNAs for Large-Artery Atherosclerosis Stroke. *Front Pharmacol*. 2021;12:791644.
8. Li G, Ma X, Zhao H, Fan J, Liu T, Luo Y, et al. Long non-coding RNA H19 promotes leukocyte inflammation in ischemic stroke by targeting the miR-29b/C1QTNF6 axis. *CNS Neuroscience & Therapeutics*. 2022;28:953–63.
9. Kotb HG, Ibrahim AH, Mohamed EF, Ali OM, Hassanein N, Badawy D, et al. The expression of microRNA 146a in patients with ischemic stroke: an observational study. *Int J Gen Med*. 2019;12:273–8.
10. Wu X, Zhang X, Li D, Zhu Z. Plasma level of miR-99b may serve as potential diagnostic and short-term prognostic markers in patients with acute cerebral infarction. *J Clin Lab Anal*. 2020;34:e23093.
11. Huang S, Zhao J, Huang D, Zhuo L, Liao S, Jiang Z. Serum miR-132 is a risk marker of post-stroke cognitive impairment. *Neurosci Lett*. 2016;615:102–6.
12. Zhai Y, Zhu Z, Li H, Zhao C, Huang Y, Wang P. miR-195 and miR-497 in acute stroke and their correlations with post-stroke cognitive impairment. *Int J Clin Exp Pathol*. 2020;13:3092–9.
13. Ma Q, Li G, Tao Z, Wang J, Wang R, Liu P, et al. Blood microRNA-93 as an indicator for diagnosis and prediction of functional recovery of acute stroke patients. *J Clin Neurosci*. 2019;62:121–7.
14. Lin X, Wang W, Tao T, Zhang D, Mao L, He X. Synthetic role of miR-411-5p and CT perfusion information in predicting clinical outcomes after thrombolysis in acute cerebral infarction. *Acta Neurol Belg*. 2022;
15. Xiang W, Tian C, Lin J, Wu X, Pang G, Zhou L, et al. Plasma let-7i and miR-15a expression are associated with the effect of recombinant tissue plasminogen activator treatment in acute ischemic stroke patients. *Thromb Res*. 2017;158:121–5.
16. Wang Z-Q, Li K, Huang J, Huo T-T, Lv P-Y. MicroRNA Let-7i Is a Promising Serum Biomarker for Post-stroke Cognitive Impairment and Alleviated OGD-Induced Cell Damage in vitro by Regulating Bcl-2. *Front Neurosci*. 2020;14:215.
17. Jickling GC, Ander BP, Shroff N, Orantia M, Stamova B, Dykstra-Aiello C, et al. Leukocyte response is regulated by microRNA let7i in patients with acute ischemic stroke. *Neurology*. 2016;87:2198–205.

## Circulating miRNA-based biomarkers of ischemic stroke recovery

18. Wang J, Huang Q, Ding J, Wang X. Elevated serum levels of brain-derived neurotrophic factor and miR-124 in acute ischemic stroke patients and the molecular mechanism. *3 Biotech*. 2019;9:386.
19. Yuan M, Guo Y-S, Zhang X-X, Gao Z-K, Shen X-Y, Han Y, et al. Diagnostic performance of miR-21, miR-124, miR-132, and miR-200b serums in post-stroke cognitive impairment patients. *Folia Neuropathol*. 2022;60:228–36.
20. Zhou X, Qi L. miR-124 Is Downregulated in Serum of Acute Cerebral Infarct Patients and Shows Diagnostic and Prognostic Value. *Clin Appl Thromb Hemost*. 2021;27:10760296211035446.
21. Ji Q, Ji Y, Peng J, Zhou X, Chen X, Zhao H, et al. Increased Brain-Specific MiR-9 and MiR-124 in the Serum Exosomes of Acute Ischemic Stroke Patients. *PLoS One*. 2016;11:e0163645.
22. He X-W, Shi Y-H, Liu Y-S, Li G-F, Zhao R, Hu Y, et al. Increased plasma levels of miR-124-3p, miR-125b-5p and miR-192-5p are associated with outcomes in acute ischaemic stroke patients receiving thrombolysis. *Atherosclerosis*. 2019;289:36–43.
23. He X-W, Shi Y-H, Zhao R, Liu Y-S, Li G-F, Hu Y, et al. Plasma Levels of miR-125b-5p and miR-206 in Acute Ischemic Stroke Patients After Recanalization Treatment: A Prospective Observational Study. *J Stroke Cerebrovasc Dis*. 2019;28:1654–61.
24. Qi Z, Zhao Y, Su Y, Cao B, Yang J-J, Xing Q. Serum Extracellular Vesicle-Derived miR-124-3p as a Diagnostic and Predictive Marker for Early-Stage Acute Ischemic Stroke. *Frontiers in Molecular Biosciences*. 2021;8:685088.
25. Jin F, Xing J. Circulating miR-126 and miR-130a levels correlate with lower disease risk, disease severity, and reduced inflammatory cytokine levels in acute ischemic stroke patients. *Neurol Sci*. 2018;39:1757–65.
26. Jin F, Xing J. Circulating pro-angiogenic and anti-angiogenic microRNA expressions in patients with acute ischemic stroke and their association with disease severity. *Neurol Sci*. 2017;38:2015–23.
27. Chen X, Zhang X, Su C, Huang S. Long noncoding RNA HULC in acute ischemic stroke: Association with disease risk, severity, and recurrence-free survival and relation with IL-6, ICAM1, miR-9, and miR-195. *J Clin Lab Anal*. 2020;34:e23500.
28. Yang G, Liu Z, Wang L, Chen X, Wang X, Dong Q, et al. MicroRNA-195 protection against focal cerebral ischemia by targeting CX3CR1. *J Neurosurg*. 2018;1–10.
29. Liu C, Huang H, Li Y, Zhao H. The relationship of long non-coding RNA maternally expressed gene 3 with microRNA-21 and their correlation with acute ischemic stroke risk, disease severity and recurrence risk. *Clin Neurol Neurosurg*. 2021;210:106940.
30. Zhou J, Zhang J. Identification of miRNA-21 and miRNA-24 in plasma as potential early stage markers of acute cerebral infarction. *Mol Med Rep*. 2014;10:971–6.

## Circulating miRNA-based biomarkers of ischemic stroke recovery

31. Wang Y, Huang J, Ma Y, Tang G, Liu Y, Chen X, et al. MicroRNA-29b is a therapeutic target in cerebral ischemia associated with aquaporin 4. *J Cereb Blood Flow Metab.* 2015;35:1977–84.
32. Ma X, Yun HJ, Elkin K, Guo Y, Ding Y, Li G. MicroRNA-29b Suppresses Inflammation and Protects Blood-Brain Barrier Integrity in Ischemic Stroke. *Mediators of Inflammation.* Hindawi; 2022;2022:e1755416.
33. Abdelaleem OO, Shaker OG, Mohamed MM, Ahmed TI, Elkhateeb AF, Abdelghaffar NK, et al. Differential Expression of Serum TUG1, LINC00657, miR-9, and miR-106a in Diabetic Patients With and Without Ischemic Stroke. *Frontiers in Molecular Biosciences.* 2022;8.
34. Xue Y, Li M, Liu D, Zhu Q, Chen H. Expression of miR-9 in the serum of patients with acute ischemic stroke and its effect on neuronal damage. *Int J Clin Exp Pathol.* Madison: E-Century Publishing Corp; 2018;11:5885–92.
35. Xie Z, Liu B, Zhou M, Chen Y. Expression and clinical significance of plasma miR-124 in acute ischemic stroke. *The Journal of Practical Medicine.* 2019;343–5.
36. Guo C, Zhong C, Li Q, Gao Y, Li W, Ou Y. [Expressions and neural function prognostic evaluation of serum microRNA-24 and microRNA-29b in elderly patients with acute ischemic stroke]. *Zhonghua Wei Zhong Bing Ji Jiu Yi Xue.* 2020;32:78–82.
37. Yuan M, Yuan H, Zhou C, Liu F, Lin C, Tang Y. The significance of low plasma miR-335 level in patients with acute cerebral infarction may be associated with the loss of control of CALM1 expression. *Int J Clin Exp Med.* Madison: E-Century Publishing Corp; 2016;9:19595–601.
38. Yuan M, Tang Y, Zhou C, Liu F, Chen L, Yuan H. Elevated plasma CaM expression in patients with acute cerebral infarction predicts poor outcomes and is inversely associated with miR-26b expression. *Int J Neurosci.* 2016;126:408–14.
39. Zhao B, Zhu Z, Hao J, Wan Z, Guo X. Decreased plasma miR-335 expression in patients with acute ischemic stroke and its association with calmodulin expression. *J Int Med Res.* 2016;44:1331–8.
40. Zhong C, Yin C, Niu G, Ning L, Pan J. MicroRNA miR-497 is closely associated with poor prognosis in patients with cerebral ischemic stroke. *Bioengineered.* 2021;12:2851–62.
41. Song X-D, Li S-X, Zhu M. Plasma miR-409-3p promotes acute cerebral infarction via suppressing CTRP3. *Kaohsiung J Med Sci.* 2021;37:324–33.
42. Yang S, Zhan X, He M, Wang J, Qiu X. miR-135b levels in the peripheral blood serve as a marker associated with acute ischemic stroke. *Exp Ther Med.* 2020;19:3551–8.
43. Liu P, Han Z, Ma Q, Liu T, Wang R, Tao Z, et al. Upregulation of MicroRNA-128 in the Peripheral Blood of Acute Ischemic Stroke Patients is Correlated with Stroke Severity Partially through Inhibition of Neuronal Cell Cycle Reentry. *Cell Transplant.* 2019;28:839–50.

### Circulating miRNA-based biomarkers of ischemic stroke recovery

44. Zhao H, Li G, Wang R, Tao Z, Ma Q, Zhang S, et al. Silencing of microRNA-494 inhibits the neurotoxic Th1 shift via regulating HDAC2-STAT4 cascade in ischaemic stroke. *Br J Pharmacol.* 2020;177:128–44.
45. Sheikhabaei S, Manizheh D, Mohammad S, Hasan TM, Saman N, Laleh R, et al. Can MiR-503 be used as a marker in diabetic patients with ischemic stroke? *BMC Endocr Disord.* 2019;19:42.
46. Guo C, Yao Y, Li Q, Gao Y, Cao H. Expression and Clinical Value of miR-185 and miR-424 in Patients with Acute Ischemic Stroke. *Int J Gen Med.* 2022;15:71–8.
47. Fu C, Chen S, Cai N, Liu Z, Wang P, Zhao J. Potential Neuroprotective Effect of miR-451 Against Cerebral Ischemia/Reperfusion Injury in Stroke Patients and a Mouse Model. *World Neurosurg.* 2019;130:e54–61.
48. Ye Z, Hu J, Xu H, Sun B, Jin Y, Zhang Y, et al. Serum Exosomal microRNA-27-3p Aggravates Cerebral Injury and Inflammation in Patients with Acute Cerebral Infarction by Targeting PPAR $\gamma$ . *Inflammation.* 2021;44:1035–48.
49. Yang Z-B, Li T-B, Zhang Z, Ren K-D, Zheng Z-F, Peng J, et al. The Diagnostic Value of Circulating Brain-specific MicroRNAs for Ischemic Stroke. *Intern Med.* 2016;55:1279–86.
50. Zhou J, Chen L, Chen B, Huang S, Zeng C, Wu H, et al. Increased serum exosomal miR-134 expression in the acute ischemic stroke patients. *BMC Neurol.* 2018;18:198.
51. Chen Z, Wang K, Huang J, Zheng G, Lv Y, Luo N, et al. Upregulated Serum MiR-146b Serves as a Biomarker for Acute Ischemic Stroke. *Cell Physiol Biochem.* 2018;45:397–405.
52. Chen Y, Song Y, Huang J, Qu M, Zhang Y, Geng J, et al. Increased Circulating Exosomal miRNA-223 Is Associated with Acute Ischemic Stroke. *Front Neurol.* 2017;8:57.
53. Liang T, Lou J. Increased Expression of mir-34a-5p and Clinical Association in Acute Ischemic Stroke Patients and in a Rat Model. *Med Sci Monit.* 2016;22:2950–5.
54. Wang Y, Zhang Y, Huang J, Chen X, Gu X, Wang Y, et al. Increase of circulating miR-223 and insulin-like growth factor-1 is associated with the pathogenesis of acute ischemic stroke in patients. *BMC Neurol.* 2014;14:77.
55. Wang Q, Wang F, Fu F, Liu J, Sun W, Chen Y. Diagnostic and prognostic value of serum miR-9-5p and miR-128-3p levels in early-stage acute ischemic stroke. *Clinics (Sao Paulo).* 2021;76:e2958.
56. Jia L, Hao F, Wang W, Qu Y. Circulating miR-145 is associated with plasma high-sensitivity C-reactive protein in acute ischemic stroke patients. *Cell Biochemistry and Function.* 2015;33:314–9.
57. Liang H-B, He J-R, Tu X-Q, Ding K-Q, Yang G-Y, Zhang Y, et al. MicroRNA-140-5p: A novel circulating biomarker for early warning of late-onset post-stroke depression. *J Psychiatr Res.* 2019;115:129–41.

### Circulating miRNA-based biomarkers of ischemic stroke recovery

58. Hu J, Zhou W, Zhou Z, Yang Q, Xu J, Dong W. miR-22 and cerebral microbleeds in brainstem and deep area are associated with depression one month after ischemic stroke. *Braz J Med Biol Res.* 2020;53:e9162.
59. Cui Y, Ma G, Kong F, Song L. Diagnostic Values of miR-221-3p in Serum and Cerebrospinal Fluid for Post-Stroke Depression and Analysis of Risk Factors. *Iranian Journal of Public Health. Tehran University of Medical Sciences;* 2021;50:1241.
